# Supplementary material for: Exploring a Potential Avenue for Beekeeping in Ireland: Safeguarding Locally Adapted Honeybees for Breeding Varroa-Resistant Lines
Source: MDPI journal article supplement (doi:10.3390/insects14100827), 2023-10-20
Supplement: s1 [file s1]

**Table S3.** Comparisons between the mean scores given to each breeding criteria trait by Irish beekeepers. Values below the diagonal are p-values resulting from pairwise t-tests. Values above the diagonal indicate the differences in mean scores between each pairing. The mean score given to brood health is significantly higher than that of all other traits.

| Trait                  | Honey Production | Gentleness | Low Swarming Behaviour | Brood Health | Varroa Resistance | Calmness on Comb | Pure Race | Genetic Diversity |
|------------------------|------------------|------------|------------------------|--------------|-------------------|------------------|-----------|-------------------|
| Honey Production       | -                | -0.477     | -0.05                  | -1.067       | -0.544            | -0.18            | -0.12     | -0.195            |
| Gentleness             | 3.117E-08        | -          | 0.427                  | -0.59        | -0.067            | 0.297            | 0.357     | 0.282             |
| Low Swarming Behaviour | 0.5727           | 4.686E-07  | -                      | -1.017       | -0.494            | -0.13            | -0.07     | -0.145            |
| Brood Health           | 2.2E-16          | 2.2E-16    | 2.2E-16                | -            | 0.523             | 0.887            | 0.947     | 0.872             |
| Varroa Resistance      | 6.316E-10        | 0.4169     | 1.15E-08               | 8.99E-14     | -                 | 0.364            | 0.424     | 0.349             |
| Calmness on Comb       | 0.04156          | 0.00047    | 0.1342                 | 2.2E-16      | 2.70E-05          | -                | 0.06      | -0.015            |
| Pure Race              | 0.2392           | 0.00033    | 0.4845                 | 2.2E-16      | 2.26E-05          | 0.5543           | -         | -0.075            |
| Genetic Diversity      | 0.04045          | 0.002      | 0.1223                 | 2.2E-16      | 0.00017           | 0.8807           | 0.488     | -                 |
