# Supplementary material for: Exploring a Potential Avenue for Beekeeping in Ireland: Safeguarding Locally Adapted Honeybees for Breeding Varroa-Resistant Lines
Source: Insects. 2023 Oct 20;14(10):827. doi: 10.3390/insects14100827 (PMC10607453; doi:10.3390/insects14100827)
Supplement: Supplementary file 1 [file insects-14-00827-s001.zip]

Archive with 4 entries (4 files):
- Figure S1.pdf
- Table S1.csv
- Table S2.csv
- Table S3.pdf
