# Supplementary material for: Exploring a Potential Avenue for Beekeeping in Ireland: Safeguarding Locally Adapted Honeybees for Breeding Varroa-Resistant Lines
Source: Insects. 2023 Oct 20;14(10):827. doi: 10.3390/insects14100827 (PMC10607453; doi:10.3390/insects14100827)
Supplement: Supplementary file 1 [file insects-14-00827-s001.zip › Table S1.csv]

1	respondant ID
2	collector ID
3	Start date
4	end date
5	IP
6	email
7	first name
8	last name
9	custom data 1
10	name
11	email
12	phone
13	about your beekeping
	how long have you been a beekeper
	how many colonies do you have
	which type of hive do you have
14	are you a member of nihbs
	yes
	no
15	do you keep dark bee
	yes
	no
	I dont know
16	why keep dark bee?
	Best for my environment
	1
	2
	3
	4
	5
	it is bee that already existed here
	1
	2
	3
	4
	5
	to conserve the native honeybee
	1
	2
	3
	4
	5
	other
17	origins of queen?
	Mated in own apiary
	mated in own area
	mated at a mating station
	bought from a pure race breeder (ireland)
	bought from a pure race breeder (other country)
	other
18	% of varroa related winter losses?
	Not a problem
	occasional losses
	serious problem
	problem every year but I have it under control
19	how often do you inspect for varroa?
	Never
	once a year (spring before treatment)
	only after treatment
	several times a year
	all year long
20	do you keep a record of treatment?
	Yes
	no
21	what do you look for in your inspection
	varroa morality before treatment
	varroa mortality after treatment
	varroa on the bees (powdered sugar or wash)
	varroa in the drone brood
	varroa in the worker brood
	reproduction of varroa
	other
22	do you aply other tests
	Pin prick method
	freeze brood etc
23	do you treat all colonies the same way?
	Yes
	no
24	I never treat for varroa
	(why?)
25	how do you treat against varroa (
	I dont
	approved chemical treatments in spring autumn
	oxalic acid in winter
	oxalic acid combined with brrod interruption queens caged in summer
	oxalic acid combined with brood interruption nuc creation
	removing drone brood
	total brood removal if necessary
	frequent nuc creation requeening
	other
26	do you practice swarm control
	No
	yes specify
27	do you think selective breeding should be carried out?
	Yes
	no
	partially
28	When considering which honeybees to breed, how important are the following traits. Treat independently of each other. Rank from 5 (highest importance) to 1 (lowest importance)
	honey production
	1
	2
	3
	4
	5
	Gentleness
	1
	2
	3
	4
	5
	low swarming behaviour
	1
	2
	3
	4
	5
	brood health
	1
	2
	3
	4
	5
	varroa resistance
	1
	2
	3
	4
	5
	calmness on comb
	1
	2
	3
	4
	5
	pure race
	1
	2
	3
	4
	5
	genetic diversity
	1
	2
	3
	4
	5
	other
29	Do you think selection of the native honeybee is a way to find a solution to the varroa problem?
	yes
	yes but as long as it does not reduce the genetic diversity of bees
	no I think other factors (environment, beekeeping practice) are mainly implicated
	no I can fight varroa effectively by other means
	I have not had to select
	others
30	Imagine that we succeeded in successfully breeding dark bees against Varroa in Ireland ("resistant native bees"). Which honeybees would you choose?
	My own bees as before, without change
	Resistant native bees, but only if they are at least good or better than my current bees
	Resistant native bees, even if they produce 25% less honey.
	Resistant native bees, even if they produce 50% less honey.
	Resistant native bees, even if they barely produce honey
	Resistant native bees, even if they are more aggressive
	Resistant native bees, even if they have a higher swarming inclination.
31	Imagine that there is another bee that is Varroa-resistant and that is well adapted to local conditions. It can be A. m. carnica, A. m. ligustica or Buckfast or a mix between any of those and A. m. millifera. Which honey bees would you choose?
	The�dark bee, even if it is not resistant
	The resistant bee, even if it is not a pure dark be
	My�own local bees, even if it is not resistant
	Resistant dark bee, even if it does not come from Ireland
32	What proportion of breeding focus should be on Varroa resistance?
	100% Varroa resistance
	50% Varroa resistance, 50% other characteristics (honey production, gentleness etc.)
	20% Varroa resistance, 80% other characteristics (honey production, gentleness etc.)
33	If research proves that there are genes that enable Varroa resistance, would you test your stock for these genes?
	Yes, would you pay for this service?
	No, why?
34	Do you think that bee research in Ireland should work for long-term Varroa resistance in the dark bee?
	Yes
	no
	it is already done
35	Would you be willing to participate in such a research project with your bees?
	Yes
	no
