# Supplementary material for: Exploring a Potential Avenue for Beekeeping in Ireland: Safeguarding Locally Adapted Honeybees for Breeding Varroa-Resistant Lines
Source: Insects. 2023 Oct 20;14(10):827. doi: 10.3390/insects14100827 (PMC10607453; doi:10.3390/insects14100827)
Supplement: Supplementary file 1 [file insects-14-00827-s001.zip › Table S2.csv]

Respondent ID	Collectors_ID	Q1 Years Beekeeping?	Q2 Number of Colonies	Q3 Hive type	Q4 NIHBS member	Q5 Keeps dark bees	Q6 Black bee is the best bee for my environment	Q7 Black bee was already here	Q8 Conservation of black bee	Q9 Other reason to keep black bee	Q10 Queens mated in own apiary	Q11 Queens mates in own area	Q12 Queens mated at a mating station	Q13 Queens bought from pure race breeder in Ireland	Q14 Queens bought from a pure race breeder abroad	Q15 Queens bought from other place	Q16 Percentage of Varroa-related winter losses	Q17 How often do you inspect your apiary for Varroa	Q18 Do you keep a record of this treatment	Q19 Varroa mortality, before treatment	Q20 Varroa mortality, after treatment	Q21 Varroa on bees	Q22 Varroa in drone brood	Q23 Varroa in worker brood	Q24 Varroa reproduction	Q25 Other Varroa inspections	Q26 Hygienic behaviour (pin-test)	Q27 Hygienic behaviour (other)	Q28 Treats all colonies the same	Q29 Never treats for Varroa (why?)	Q30 Varroa treatment (I don't treat)	Q31 Approved chemical treatments in spring/autumn	Q32 Oxalic acid in winter	Q33 oxalic acid and Queen caged	Q34 Oxalic acid and nuc creation	Q35 Removal of drone brood	Q36 Removal of all brood	Q37 Frequent nuc creation/requeening	Q38 Other varroa treatment	Q39 Practice swarm control	Q40 Swarm control methods	Q41 Should selection be carried out	Q42 Honey production	Q43 Gentleness	Q44 Low swarming behaviour	Q45 Brood health	Q46 Varroa resistance	Q47 Calmness on comb	Q48 Pure race
12348454840	392208789	2	3	national, poly	yes	yes	3	3	5		Queens mated in own apiary			Queens bought from a pure race breeder (from Ireland)			Varroa is not a problem for me (about 5% of colony losses/year due to Varroa)	Once a year (spring or before treatment)	Yes		Varroa mortality, after treatment	Varroa on bees							Yes			Approved chemical treatments in Spring/Autumn	Oxalic acid in winter							Yes (please specify which method and how often)	remove to a nuc	Partially, breeding from the best queens should be carried out, but the other less productive colonies should not be systematically requeened	3	3	2	4	2	4	4
12345848658	392208789	1	2	national with thick walls.	no	yes	4	4	4	neither colonies were through choice, but i'm pleased the bees were dark.		Queens mated in own area
12342739086	392208789	34	140	commercial	no	yes		5	5		Queens mated in own apiary						There are occasional losses due to Varroa or viruses (10-20%/year)	Several times a year	Yes			Varroa on bees	Varroa in the drone brood						Yes			Approved chemical treatments in Spring/Autumn	Oxalic acid in winter							Yes (please specify which method and how often)	nucleus method throughout season
12336841016	392208789	15	25	national	no	no	1	1	1						Queens bought from a pure race breeder (from other countries)		Varroa is a problem for me every year, but I have things under control through treatments)	Several times a year	Yes			Varroa on bees	Varroa in the drone brood						Yes			Approved chemical treatments in Spring/Autumn	Oxalic acid in winter							Yes (please specify which method and how often)	the nuc method	Yes, selection (breeding only from the best queens) should be performed to have productive and healthy colonies	5	5	5	5	2	5	1
12332617414	392208789	40	30	national	yes	yes	5	5	5		Queens mated in own apiary					some queens from other irish breeders	There are occasional losses due to Varroa or viruses (10-20%/year)	Once a year (spring or before treatment)	No		Varroa mortality, after treatment	Varroa on bees	Varroa in the drone brood	Varroa in the worker brood					No, I treat colonies depending on their individual infestation levels			Approved chemical treatments in Spring/Autumn	Oxalic acid in winter			Removing drone brood	Total brood removal if necessary		currently x 2 no treat aparies with various bee lines.	Yes (please specify which method and how often)	clip & mark queens. allow bees to re queen themselves with help to prevent swarming . keep old queen safe in a nuc and make a nuc with q cells.	Partially, breeding from the best queens should be carried out, but the other less productive colonies should not be systematically requeened	5	4	4	5	5	4	5
12327999049	392208789	10	18	national	no	yes	4	5	5			Queens mated in own area					Varroa is not a problem for me (about 5% of colony losses/year due to Varroa)	Only after treatment	No		Varroa mortality, after treatment								Yes				Oxalic acid in winter							Yes (please specify which method and how often)	remove resident queen to nuc.	No, selection should not be performed (every colony is allowed to requeen freely).	4	3	2	4	2	3	5
12322267077	392208789	15	2	national	yes	i don't know	5		5							i don't know	Varroa is a problem for me every year, but I have things under control through treatments)	All year long	Yes				Varroa in the drone brood	Varroa in the worker brood					Yes										apiuard in autumn	Yes (please specify which method and how often)	not yet.	Partially, breeding from the best queens should be carried out, but the other less productive colonies should not be systematically requeened	3	3	3	4	5	3	1
12321889192	392208789	6	2	national brood	yes	yes	5	5	5					Queens bought from a pure race breeder (from Ireland)				Several times a year	No										Yes							Removing drone brood				No		Yes, selection (breeding only from the best queens) should be performed to have productive and healthy colonies	4	5	5	5	5	5	5
12321752825	392208789	50	80	national	yes	yes	5	5	5		Queens mated in own apiary						Varroa is not a problem for me (about 5% of colony losses/year due to Varroa)	Several times a year	No				Varroa in the drone brood			deform wing			No, I treat colonies depending on their individual infestation levels		I don't treat									Yes (please specify which method and how often)	9day inspections	Partially, breeding from the best queens should be carried out, but the other less productive colonies should not be systematically requeened	3	5	4	5	5	3	5
12321679537	392208789	40	5	commercial & national standard	yes	yes	5	3	5			Queens mated in own area					There are occasional losses due to Varroa or viruses (10-20%/year)	All year long	Yes	Varroa mortality, before treatment	Varroa mortality, after treatment	Varroa on bees	Varroa in the drone brood	Varroa in the worker brood					No, I treat colonies depending on their individual infestation levels			Approved chemical treatments in Spring/Autumn								Yes (please specify which method and how often)	take queen out and allow hive to requeen themselves as needed	Partially, breeding from the best queens should be carried out, but the other less productive colonies should not be systematically requeened	4	5	5	5	3	3	5
12319229399	392208789	8	10	national	yes	yes	5	5	5		Queens mated in own apiary	Queens mated in own area					Varroa is a problem for me every year, but I have things under control through treatments)	Once a year (spring or before treatment)	Yes			Varroa on bees							Yes				Oxalic acid in winter				Total brood removal if necessary			Yes (please specify which method and how often)	usually take the queen away in a nuc	Yes, selection (breeding only from the best queens) should be performed to have productive and healthy colonies	4	5	5	5	4	3	5
12297503899	392208789	42	68	standard national	yes	yes	5	5	5		Queens mated in own apiary						Varroa is not a problem for me (about 5% of colony losses/year due to Varroa)	Several times a year	Yes		Varroa mortality, after treatment		Varroa in the drone brood						Yes			Approved chemical treatments in Spring/Autumn	Oxalic acid in winter							Yes (please specify which method and how often)	making up nukes	Partially, breeding from the best queens should be carried out, but the other less productive colonies should not be systematically requeened	5	4	4	5	4	4	4
12291810020	392208789	26	10	national	yes	yes	4	4	4			Queens mated in own area		Queens bought from a pure race breeder (from Ireland)			Varroa is not a problem for me (about 5% of colony losses/year due to Varroa)	All year long	Yes	Varroa mortality, before treatment		Varroa on bees	Varroa in the drone brood						No, I treat colonies depending on their individual infestation levels			Approved chemical treatments in Spring/Autumn							oxalic acid gas vap	Yes (please specify which method and how often)	ten day inspections and artificial swarm control	Yes, selection (breeding only from the best queens) should be performed to have productive and healthy colonies	3	4	4	5	2	4	3
12272476578	392208789	10	60	national	yes	yes	4	4	4	it's what i started with, we have a dark bee conservation area, crosses with eg buckfast can be very cross, would like to conserve native stock	Queens mated in own apiary	Queens mated in own area				currently have 8 apiary sites, bought original stock from beekeepers with mainly 'dark irish bees', would have got some queens from local beekeepers needing assistance.	Varroa is a problem for me every year, but I have things under control through treatments)	Several times a year	Yes	Varroa mortality, before treatment	Varroa mortality, after treatment		Varroa in the drone brood	Varroa in the worker brood	Reproduction of Varroa	dwv			Yes			Approved chemical treatments in Spring/Autumn	Oxalic acid in winter					Frequent nuc creation/requeening	i use queens from best hives	Yes (please specify which method and how often)	nucleus generally once per year	Partially, breeding from the best queens should be carried out, but the other less productive colonies should not be systematically requeened	5	4	4	5	4	4	4
12267184864	392208789	40	20	national	yes	yes	4	4	5		Queens mated in own apiary						There are occasional losses due to Varroa or viruses (10-20%/year)	Once a year (spring or before treatment)	Yes				Varroa in the drone brood			general observation during inspections			Yes			Approved chemical treatments in Spring/Autumn	Oxalic acid in winter							Yes (please specify which method and how often)	clipped queens, queen removal and requeening, splits	Yes, selection (breeding only from the best queens) should be performed to have productive and healthy colonies	3	3	3	5	3	3	3
12261972820	392208789	6	7	national	no	yes	5	5	5		Queens mated in own apiary						There are occasional losses due to Varroa or viruses (10-20%/year)	Only after treatment	Yes				Varroa in the drone brood						Yes			Approved chemical treatments in Spring/Autumn	Oxalic acid in winter					Frequent nuc creation/requeening		Yes (please specify which method and how often)	artificial swarm	No, selection should not be performed (every colony is allowed to requeen freely).	4	3	5	5	5	3	4
12253304586	392208789	5	3	rose and national	yes	yes	5	3	5		Queens mated in own apiary						Varroa is not a problem for me (about 5% of colony losses/year due to Varroa)	Several times a year	No			Varroa on bees				varroa on base board			No, I treat colonies depending on their individual infestation levels			Approved chemical treatments in Spring/Autumn	Oxalic acid in winter		Oxalic acid combined with brood interruption (nuc creation)					Yes (please specify which method and how often)	creating a new nuc colony with old queen, leave 1 cell. as required	Yes, selection (breeding only from the best queens) should be performed to have productive and healthy colonies	5	5	4	5	5	3	5
12251925760	392208789	3	4	national	no	yes	5	5	5		Queens mated in own apiary						There are occasional losses due to Varroa or viruses (10-20%/year)	Once a year (spring or before treatment)	No	Varroa mortality, before treatment								Hygienic behaviour, other methods (freeze brood etc.)	Yes			Approved chemical treatments in Spring/Autumn								Yes (please specify which method and how often)	artificial swarm as needed	Partially, breeding from the best queens should be carried out, but the other less productive colonies should not be systematically requeened	4	5	3	5	5	5	4
12250011738	392208789	8	4	national	no	yes	4	4	3			Queens mated in own area					Varroa is a problem for me every year, but I have things under control through treatments)	Several times a year	Yes	Varroa mortality, before treatment	Varroa mortality, after treatment		Varroa in the drone brood						Yes			Approved chemical treatments in Spring/Autumn	Oxalic acid in winter			Removing drone brood				No		Yes, selection (breeding only from the best queens) should be performed to have productive and healthy colonies	1	4	4	4	3	3	2
12249649246	392208789	3	3	national poly hive	no	yes	5	5	5			Queens mated in own area					Varroa is not a problem for me (about 5% of colony losses/year due to Varroa)	Only after treatment	Yes		Varroa mortality, after treatment						Hygienic behaviour (pin-test method)		Yes			Approved chemical treatments in Spring/Autumn								No		No, selection should not be performed (every colony is allowed to requeen freely).	4	4	3	5	3	4	4
12249352294	392208789	15	10	bs	no	yes	5	4	5		Queens mated in own apiary						Varroa is a problem for me every year, but I have things under control through treatments)	All year long	No	Varroa mortality, before treatment	Varroa mortality, after treatment		Varroa in the drone brood						Yes										fogging	Yes (please specify which method and how often)	nucs	Yes, selection (breeding only from the best queens) should be performed to have productive and healthy colonies	4	4	5	4	4	4	4
12245392585	392208789	45	50	national	yes	yes	5	5	5	it is the only honeybee adapted to irish conditions	Queens mated in own apiary						Varroa is not a problem for me (about 5% of colony losses/year due to Varroa)	Several times a year	Yes			Varroa on bees							No, I treat colonies depending on their individual infestation levels										i use sugar dusting on the colonies that need treatment about four times in the summer	No		Yes, selection (breeding only from the best queens) should be performed to have productive and healthy colonies	1	5	4	4	4	4	5
12245019130	392208789	10	10	national mainly, one cdb	yes	yes	5		5		Queens mated in own apiary			Queens bought from a pure race breeder (from Ireland)			Varroa is not a problem for me (about 5% of colony losses/year due to Varroa)	Several times a year	Yes	Varroa mortality, before treatment	Varroa mortality, after treatment								Yes			Approved chemical treatments in Spring/Autumn	Oxalic acid in winter							Yes (please specify which method and how often)	pagden or remove q to a nuc	Yes, selection (breeding only from the best queens) should be performed to have productive and healthy colonies	3	5	3	5	5	5	4
12237857644	392208789	6	6	national	no	no					Queens mated in own apiary				Queens bought from a pure race breeder (from other countries)
12237211586	392208789	5	3	national	no	yes	5	4	5		Queens mated in own apiary						Varroa is not a problem for me (about 5% of colony losses/year due to Varroa)	Once a year (spring or before treatment)	Yes		Varroa mortality, after treatment								Yes			Approved chemical treatments in Spring/Autumn								No		Partially, breeding from the best queens should be carried out, but the other less productive colonies should not be systematically requeened	1	5	3	5	5	3	2
12235888798	392208789	6	3	national and two nukes, one with extension	no	yes	5	5	5		Queens mated in own apiary			Queens bought from a pure race breeder (from Ireland)			There are occasional losses due to Varroa or viruses (10-20%/year)	Only after treatment	Yes		Varroa mortality, after treatment											Approved chemical treatments in Spring/Autumn								Yes (please specify which method and how often)	removal of queen cells, division of hive	Partially, breeding from the best queens should be carried out, but the other less productive colonies should not be systematically requeened		5	5	5	5	5	5
12235609062	392208789	40	20	national and langstroth	no	no									Queens bought from a pure race breeder (from other countries)		Varroa is not a problem for me (about 5% of colony losses/year due to Varroa)	Several times a year	No				Varroa in the drone brood						Yes				Oxalic acid in winter							Yes (please specify which method and how often)	artificial swarm control and queen replacement	Yes, selection (breeding only from the best queens) should be performed to have productive and healthy colonies	5	5	5	5	4	4	4
12235460414	392208789	9	5	national	no	yes	4	3	4		Queens mated in own apiary						There are occasional losses due to Varroa or viruses (10-20%/year)	Once a year (spring or before treatment)	Yes		Varroa mortality, after treatment	Varroa on bees							Yes				Oxalic acid in winter							Yes (please specify which method and how often)	artificial swarm, as required	Yes, selection (breeding only from the best queens) should be performed to have productive and healthy colonies	3	5	3	5	5	5	4
12234592684	392208789	2	10	rose	no	no					Queens mated in own apiary				Queens bought from a pure race breeder (from other countries)		Varroa is not a problem for me (about 5% of colony losses/year due to Varroa)	Only after treatment	Yes		Varroa mortality, after treatment								Yes			Approved chemical treatments in Spring/Autumn	Oxalic acid in winter			Removing drone brood				Yes (please specify which method and how often)	split colonies when needed	Yes, selection (breeding only from the best queens) should be performed to have productive and healthy colonies	5	5	4	4	3	4	1
12233795188	392208789	10	14	national	yes	yes	5	1	5			Queens mated in own area	Own queens mated at a particular mating station	Queens bought from a pure race breeder (from Ireland)			Varroa is not a problem for me (about 5% of colony losses/year due to Varroa)	Several times a year	Yes	Varroa mortality, before treatment	Varroa mortality, after treatment								No, I treat colonies depending on their individual infestation levels			Approved chemical treatments in Spring/Autumn	Oxalic acid in winter							Yes (please specify which method and how often)	remove queen to nuc	Yes, selection (breeding only from the best queens) should be performed to have productive and healthy colonies	3	5	2	5	5	5	4
12233670224	392208789	9	7	national	no	yes	3	3	3		Queens mated in own apiary	Queens mated in own area					Varroa is not a problem for me (about 5% of colony losses/year due to Varroa)	Several times a year	Yes		Varroa mortality, after treatment		Varroa in the drone brood	Varroa in the worker brood			Hygienic behaviour (pin-test method)		Yes			Approved chemical treatments in Spring/Autumn								Yes (please specify which method and how often)	artificial swarm method and also queen cell removal	No, selection should not be performed (every colony is allowed to requeen freely).	3	3	4	5	4	4	1
12231584824	392208789	5	6	national	no	yes		4			Queens mated in own apiary						There are occasional losses due to Varroa or viruses (10-20%/year)	Several times a year	Yes			Varroa on bees							I never treat for Varroa. (please specify why)	i haven't treated for varroa in 3 years, i prefer to allow the bees to tray and build up a natural defence.									if i can, i do an artificial swarm or remove brood to break the mites lifecycle	Yes (please specify which method and how often)	when necessary, artificial swarm or nuc creation	No, selection should not be performed (every colony is allowed to requeen freely).	4		3	5	4	3	3
12231456288	392208789	2	1	national	no	yes	5	5	5			Queens mated in own area					Varroa is a problem for me every year, but I have things under control through treatments)	Several times a year	Yes							varroa count on a white floor insert.			No, I treat colonies depending on their individual infestation levels			Approved chemical treatments in Spring/Autumn								Yes (please specify which method and how often)	remove queen cells
12231300130	392208789	5	0	national	no	yes	3	3	4			Queens mated in own area					Varroa is a problem for me every year, but I have things under control through treatments)	Once a year (spring or before treatment)	Yes			Varroa on bees						Hygienic behaviour, other methods (freeze brood etc.)	Yes			Approved chemical treatments in Spring/Autumn								No		No, selection should not be performed (every colony is allowed to requeen freely).	3	3	3	3	3	3	3
12231276163	392208789	3	2	swienty langstroth polystyrene	no	yes	5	5	5			Queens mated in own area					Varroa is a problem for me every year, but I have things under control through treatments)	All year long	Yes				Varroa in the drone brood			mite drop count on white lid under hive,seeing mites on bees.			No, I treat colonies depending on their individual infestation levels			Approved chemical treatments in Spring/Autumn								No		Yes, selection (breeding only from the best queens) should be performed to have productive and healthy colonies	3	5	4	5	5	5	4
12231109451	392208789	6		national	no	yes	5		5		Queens mated in own apiary			Queens bought from a pure race breeder (from Ireland)			Varroa is not a problem for me (about 5% of colony losses/year due to Varroa)	All year long	No		Varroa mortality, after treatment	Varroa on bees	Varroa in the drone brood						Yes							Removing drone brood		Frequent nuc creation/requeening	apiguard beginning august	Yes (please specify which method and how often)	nucleus	Yes, selection (breeding only from the best queens) should be performed to have productive and healthy colonies	2	3			4		5
12230749043	392208789	2	3	commrecial	yes	yes	5	5	3	my brother keeps pure black bees in galway for 10 years		Queens mated in own area				first hive from pure stock from galway	Varroa is not a problem for me (about 5% of colony losses/year due to Varroa)	Never	No							i do not check for varroa and so far not lost any hives			I never treat for Varroa. (please specify why)	my bees come from stock that have not been treated for varroa for over 10 years	I don't treat									Yes (please specify which method and how often)	artificial swarm method	Yes, selection (breeding only from the best queens) should be performed to have productive and healthy colonies	4	5	5	5	5	5	5
12230519882	392208789	3	3	national	no	yes	5	5	5			Queens mated in own area					Varroa is not a problem for me (about 5% of colony losses/year due to Varroa)	Never	No										I never treat for Varroa. (please specify why)	its not been a problem for me (yet)	I don't treat									Yes (please specify which method and how often)	giving colonies plenty of room, and splitting colonies	Yes, selection (breeding only from the best queens) should be performed to have productive and healthy colonies	3	5	5	5	5	5	3
12227167612	392208789	3	4	national	no	yes	4	4	4		Queens mated in own apiary	Queens mated in own area					There are occasional losses due to Varroa or viruses (10-20%/year)	Once a year (spring or before treatment)	Yes			Varroa on bees							Yes										thyme oil spring and autumn, grow mint and thyme around the apiary	No		No, selection should not be performed (every colony is allowed to requeen freely).	3	3	3	5	3	3	1
12226973031	392208789	20	80	national	no	yes	5	5	5		Queens mated in own apiary						Varroa is not a problem for me (about 5% of colony losses/year due to Varroa)	All year long	Yes				Varroa in the drone brood	Varroa in the worker brood		varroa on bees, varroa on slide			No, I treat colonies depending on their individual infestation levels				Oxalic acid in winter			Removing drone brood	Total brood removal if necessary	Frequent nuc creation/requeening	apiguard in autumn	Yes (please specify which method and how often)	reduce strong colonies, remove q +nuk leaving qc	Yes, selection (breeding only from the best queens) should be performed to have productive and healthy colonies	5	5	5	5	5	2	3
12226766430	392208789	10	8	commercial and national	no	yes	5	5	5		Queens mated in own apiary			Queens bought from a pure race breeder (from Ireland)			Varroa is not a problem for me (about 5% of colony losses/year due to Varroa)	Several times a year	Yes	Varroa mortality, before treatment	Varroa mortality, after treatment		Varroa in the drone brood	Varroa in the worker brood					Yes				Oxalic acid in winter					Frequent nuc creation/requeening		Yes (please specify which method and how often)	old queen removed to a nuc ,hive left with one queen cell.	Yes, selection (breeding only from the best queens) should be performed to have productive and healthy colonies	4	4	4	4	4	2	5
12225523059	392208789	24	7	national	no	no						Queens mated in own area					There are occasional losses due to Varroa or viruses (10-20%/year)	Never	Yes										Yes			Approved chemical treatments in Spring/Autumn	Oxalic acid in winter							Yes (please specify which method and how often)	artificial swarms, normally	Partially, breeding from the best queens should be carried out, but the other less productive colonies should not be systematically requeened	4	4	3	2	2	1	1
12225515568	392208789	8	2	national	no	yes	4	3	4			Queens mated in own area					Varroa is not a problem for me (about 5% of colony losses/year due to Varroa)	Several times a year	Yes	Varroa mortality, before treatment		Varroa on bees	Varroa in the drone brood						Yes		I don't treat									Yes (please specify which method and how often)	artificial swarm, as needed (for me, typically once per colony per year)	Partially, breeding from the best queens should be carried out, but the other less productive colonies should not be systematically requeened	2	5	5	5	5	2	3
12225327914	392208789	4	5	national	yes	yes	5	4	5			Queens mated in own area					There are occasional losses due to Varroa or viruses (10-20%/year)	Several times a year	Yes	Varroa mortality, before treatment	Varroa mortality, after treatment	Varroa on bees	Varroa in the drone brood	Varroa in the worker brood	Reproduction of Varroa				Yes			Approved chemical treatments in Spring/Autumn	Oxalic acid in winter			Removing drone brood				Yes (please specify which method and how often)	splits, as needed	Partially, breeding from the best queens should be carried out, but the other less productive colonies should not be systematically requeened	3	4	4	5	5	4	4
12225324921	392208789	4	9	commercial	no	yes	5	5	5			Queens mated in own area		Queens bought from a pure race breeder (from Ireland)			Varroa is not a problem for me (about 5% of colony losses/year due to Varroa)	Several times a year	No							i don't treat			I never treat for Varroa. (please specify why)	i have a low level of varroa mites.	I don't treat									Yes (please specify which method and how often)	remove queen to nuc and leave qc's in brood box.	Partially, breeding from the best queens should be carried out, but the other less productive colonies should not be systematically requeened	5	4	4	5	5	4	4
12225218735	392208789	2	2	commercial	no	yes	5	5	5			Queens mated in own area					Varroa is not a problem for me (about 5% of colony losses/year due to Varroa)	Never	No							don’t treat			I never treat for Varroa. (please specify why)	normal practice for our association	I don't treat									Yes (please specify which method and how often)	splits
12225050978	392208789	8	8	commercial	yes	yes	5	5	5		Queens mated in own apiary						There are occasional losses due to Varroa or viruses (10-20%/year)	Once a year (spring or before treatment)	Yes		Varroa mortality, after treatment								No, I treat colonies depending on their individual infestation levels			Approved chemical treatments in Spring/Autumn								Yes (please specify which method and how often)	split/nuc method	No, selection should not be performed (every colony is allowed to requeen freely).	4	4	2	4	3	3	3
12224020395	392208789	20	5	national/commercial mixture	no	no					Queens mated in own apiary	Queens mated in own area					There are occasional losses due to Varroa or viruses (10-20%/year)	All year long	Yes	Varroa mortality, before treatment	Varroa mortality, after treatment		Varroa in the drone brood		Reproduction of Varroa				No, I treat colonies depending on their individual infestation levels				Oxalic acid in winter						fogging with food grade mineral oil	Yes (please specify which method and how often)	splitting hives, artificial swarms	Yes, selection (breeding only from the best queens) should be performed to have productive and healthy colonies	4	3	2	4	3	3	1
12223609140	392208789	5	15	national	no	yes	5	5	5			Queens mated in own area					Varroa is a problem for me every year, but I have things under control through treatments)	Several times a year	Yes				Varroa in the drone brood			mite drop			Yes			Approved chemical treatments in Spring/Autumn								Yes (please specify which method and how often)	variation on pagden	Yes, selection (breeding only from the best queens) should be performed to have productive and healthy colonies	4	5	3	5	5	4	5
12223419705	392208789	50	2	commercial	no	yes	5	5	5		Queens mated in own apiary	Queens mated in own area					Varroa is not a problem for me (about 5% of colony losses/year due to Varroa)	All year long	No							varroa on floor board			I never treat for Varroa. (please specify why)	as a member of fingal association, we have decided not to treat any of our bees with chemicals	I don't treat									Yes (please specify which method and how often)	usually by making artificial swarm	No, selection should not be performed (every colony is allowed to requeen freely).	5	4	5	5	5	5	1
12223304581	392208789	15	2	commercial	yes	yes	5	5	5			Queens mated in own area					Varroa is not a problem for me (about 5% of colony losses/year due to Varroa)	Several times a year	Yes			Varroa on bees	Varroa in the drone brood	Varroa in the worker brood					I never treat for Varroa. (please specify why)	my mentor beekeeper advises that and i got bees from him. trying to keep varroa resistant colonies	I don't treat									Yes (please specify which method and how often)	split cilony when few queen cells are vissable and reduction in egg laying and the change of mood in hive	No, selection should not be performed (every colony is allowed to requeen freely).	5	5	3	5	5	5	5
12223270653	392208789	9	22	commercial	no	yes	1	5	5			Queens mated in own area					Varroa is not a problem for me (about 5% of colony losses/year due to Varroa)	Once a year (spring or before treatment)				Varroa on bees							I never treat for Varroa. (please specify why)	i stopped treating 5 years ago to help my colonies become varroa resistant	I don't treat									Yes (please specify which method and how often)	artificial swarm control once a season	No, selection should not be performed (every colony is allowed to requeen freely).	3	5	3	5	5	5	4
12223203566	392208789	1	3	national	no	yes	1	1	1		Queens mated in own apiary						Varroa is not a problem for me (about 5% of colony losses/year due to Varroa)	Several times a year	Yes	Varroa mortality, before treatment									Yes			Approved chemical treatments in Spring/Autumn								Yes (please specify which method and how often)	artificial swarm	Partially, breeding from the best queens should be carried out, but the other less productive colonies should not be systematically requeened	4	4	4	5	5	3	5
12223200546	392208789	5	1	commercial	no	yes	4	4	5							swarm in	There are occasional losses due to Varroa or viruses (10-20%/year)	Once a year (spring or before treatment)	No	Varroa mortality, before treatment			Varroa in the drone brood	Varroa in the worker brood					Yes		I don't treat									Yes (please specify which method and how often)	not applicable currently	Partially, breeding from the best queens should be carried out, but the other less productive colonies should not be systematically requeened	2	3	3	5	3	3	3
12223066423	392208789	3	8	national	yes	yes	5	4	3			Queens mated in own area					Varroa is a problem for me every year, but I have things under control through treatments)	Several times a year	Yes	Varroa mortality, before treatment	Varroa mortality, after treatment		Varroa in the drone brood		Reproduction of Varroa				No, I treat colonies depending on their individual infestation levels			Approved chemical treatments in Spring/Autumn	Oxalic acid in winter							Yes (please specify which method and how often)	clipping, artificial swarm method, making room to prevent	Yes, selection (breeding only from the best queens) should be performed to have productive and healthy colonies	5	4	3	5	4	4	4
12222973494	392208789	8	10	national & commerical	yes	yes	4	4	5			Queens mated in own area					Varroa is a problem for me every year, but I have things under control through treatments)	Several times a year	Yes	Varroa mortality, before treatment	Varroa mortality, after treatment								No, I treat colonies depending on their individual infestation levels			Approved chemical treatments in Spring/Autumn							vaporise after frost in december	Yes (please specify which method and how often)	splitting	Yes, selection (breeding only from the best queens) should be performed to have productive and healthy colonies	3	4	4	5	4	4	5
12221818123	392208789	3	4	national	no	yes	4	5	4		Queens mated in own apiary						Varroa is a problem for me every year, but I have things under control through treatments)	Several times a year	Yes							evidence on floor			Yes			Approved chemical treatments in Spring/Autumn								Yes (please specify which method and how often)	splitting, queen cell removal, extra space	Partially, breeding from the best queens should be carried out, but the other less productive colonies should not be systematically requeened	4	3	4	3	2	2	4
12221763108	392208789	2	1	national	no	yes				i got this species as a swarm from another beekeeper to help me get started, but it would be my preferred strain if i had to purchase a colony; i am very anxious to preserve the native species.						in june the original queen that came with the swarm (2019) disappeared so my local beekeeping contact set up another queen from a queen cell in my hive. this queen also disappeared in august so i left another queen develop from a supersedure? cell in the hive. everything settled down after that and i think i have a strong colony now; i'm making that judgement on the quantity of pollen i observed …	Varroa is not a problem for me (about 5% of colony losses/year due to Varroa)	Several times a year	Yes							varroa count on the inspection board under the open mesh floor.			Yes			Approved chemical treatments in Spring/Autumn								Yes (please specify which method and how often)	clip wings on queen. next spring i'm planning to split my hive if i judge that the colony is strong enough.	Partially, breeding from the best queens should be carried out, but the other less productive colonies should not be systematically requeened	4	4	3	5	5	4	4
12221503352	392208789	30	14	national	no	yes	3	4	4		Queens mated in own apiary	Queens mated in own area						Never	No							i believe my bees are resitant			Yes				Oxalic acid in winter						i only use oxalic as precautionary however i believe they could be resistant at this stage	Yes (please specify which method and how often)	artificial swarm	Partially, breeding from the best queens should be carried out, but the other less productive colonies should not be systematically requeened	5	4	4	4	5	4	3
12221020093	392208789	35	10	national	no	yes		3	3			Queens mated in own area					Varroa is not a problem for me (about 5% of colony losses/year due to Varroa)	All year long	Yes				Varroa in the drone brood			inspection board under floor			Yes				Oxalic acid in winter							Yes (please specify which method and how often)	clipped queens, splitting when appropriate	Partially, breeding from the best queens should be carried out, but the other less productive colonies should not be systematically requeened	5	4	3	5	3	3	1
12220189877	392208789	10	2	top bar	no	yes	5	3	5			Queens mated in own area					There are occasional losses due to Varroa or viruses (10-20%/year)	Several times a year	No			Varroa on bees	Varroa in the drone brood	Varroa in the worker brood					No, I treat colonies depending on their individual infestation levels				Oxalic acid in winter							Yes (please specify which method and how often)	splitting hives		3	5	3	5	4	3	1
12219714441	392208789	8	20	national + 1 warree	no	yes	5	5	5			Queens mated in own area				feral swarms	Varroa is not a problem for me (about 5% of colony losses/year due to Varroa)	Once a year (spring or before treatment)	No				Varroa in the drone brood	Varroa in the worker brood					I never treat for Varroa. (please specify why)	i'm an organic farmer/ 4 feral colonies local	I don't treat									No		No, selection should not be performed (every colony is allowed to requeen freely).	4	5	5	5	5	5	5
12219597472	392208789	50	60	national	no	no				native bee usless for commercial use, low honey yields, ok for the hobbyist			Own queens mated at a particular mating station				Varroa is not a problem for me (about 5% of colony losses/year due to Varroa)	Several times a year	Yes		Varroa mortality, after treatment								No, I treat colonies depending on their individual infestation levels			Approved chemical treatments in Spring/Autumn								Yes (please specify which method and how often)	colony split	Yes, selection (breeding only from the best queens) should be performed to have productive and healthy colonies	5	3	3	5	5	3	4
12219580815	392208789	3	6	national	no	yes	4	4	5			Queens mated in own area				from queen rearer in local assoc.	Varroa is not a problem for me (about 5% of colony losses/year due to Varroa)	All year long	No		Varroa mortality, after treatment						Hygienic behaviour (pin-test method)		Yes			Approved chemical treatments in Spring/Autumn	Oxalic acid in winter							Yes (please specify which method and how often)	nuc method	Partially, breeding from the best queens should be carried out, but the other less productive colonies should not be systematically requeened	4	3	4	5	5	3	4
12219559011	392208789	3	2	national	no	yes	5	5	5	mostly to conserve this native irish black bee	Queens mated in own apiary			Queens bought from a pure race breeder (from Ireland)			Varroa is not a problem for me (about 5% of colony losses/year due to Varroa)	Never	No							i look to see if the bees are managing the varroa themselves			I never treat for Varroa. (please specify why)	the bees know best. they become strong during natural brood breaks.	I don't treat									Yes (please specify which method and how often)	artificial swarm method and 7day monitoring/hive inspections.	No, selection should not be performed (every colony is allowed to requeen freely).	1	3	3	5	5	2	5
12219473255	392208789	4	2	national	no	yes	5	5	5			Queens mated in own area		Queens bought from a pure race breeder (from Ireland)			Varroa is a problem for me every year, but I have things under control through treatments)	Once a year (spring or before treatment)	No		Varroa mortality, after treatment								Yes			Approved chemical treatments in Spring/Autumn	Oxalic acid in winter							No		Yes, selection (breeding only from the best queens) should be performed to have productive and healthy colonies	3	5	5	5	5	5	5
12219361982	392208789	2	4	poly national	no	yes	5	5	4			Queens mated in own area					Varroa is not a problem for me (about 5% of colony losses/year due to Varroa)	All year long	Yes	Varroa mortality, before treatment	Varroa mortality, after treatment								No, I treat colonies depending on their individual infestation levels			Approved chemical treatments in Spring/Autumn	Oxalic acid in winter							Yes (please specify which method and how often)	once spring	Partially, breeding from the best queens should be carried out, but the other less productive colonies should not be systematically requeened	3	5	5	5	5	5	3
12218243971	392208789	17	10		no	i don't know	5	5	5		Queens mated in own apiary						There are occasional losses due to Varroa or viruses (10-20%/year)	Once a year (spring or before treatment)	No	Varroa mortality, before treatment	Varroa mortality, after treatment		Varroa in the drone brood						Yes				Oxalic acid in winter							Yes (please specify which method and how often)	artificial swarm	Yes, selection (breeding only from the best queens) should be performed to have productive and healthy colonies	4	3	3		2	3	1
12218031670	392208789	15	13	national & commercial	no	yes	5	1	5			Queens mated in own area					Varroa is not a problem for me (about 5% of colony losses/year due to Varroa)	Several times a year	No				Varroa in the drone brood					Hygienic behaviour, other methods (freeze brood etc.)	Yes				Oxalic acid in winter							No		Partially, breeding from the best queens should be carried out, but the other less productive colonies should not be systematically requeened	4	4	3	5	3	3	1
12217876746	392208789	25	15	commercial/national	no	yes	5	2	5			Queens mated in own area		Queens bought from a pure race breeder (from Ireland)			Varroa is not a problem for me (about 5% of colony losses/year due to Varroa)	Several times a year	Yes	Varroa mortality, before treatment	Varroa mortality, after treatment		Varroa in the drone brood						Yes			Approved chemical treatments in Spring/Autumn								Yes (please specify which method and how often)	every 7/10 days in swarm may/july. remove queen to small nuc and leave 1 qc in the main hive.	Yes, selection (breeding only from the best queens) should be performed to have productive and healthy colonies	5	5	3	5	5	3	3
12217845544	392208789	40	25	national	yes	yes	5	5	5			Queens mated in own area					Varroa is not a problem for me (about 5% of colony losses/year due to Varroa)	Several times a year	Yes	Varroa mortality, before treatment	Varroa mortality, after treatment		Varroa in the drone brood						Yes			Approved chemical treatments in Spring/Autumn								Yes (please specify which method and how often)	demaree	Yes, selection (breeding only from the best queens) should be performed to have productive and healthy colonies	2	5	5	4	3	5	5
12217786939	392208789	30	4	national polyhives	no	yes	3	4	3	in northern ireland i think irish dark bee is really only a myth. my bees are mongrels bred from the surrounding area	Queens mated in own apiary	Queens mated in own area					There are occasional losses due to Varroa or viruses (10-20%/year)	All year long	Yes		Varroa mortality, after treatment	Varroa on bees	Varroa in the drone brood					Hygienic behaviour, other methods (freeze brood etc.)	Yes			Approved chemical treatments in Spring/Autumn	Oxalic acid in winter			Removing drone brood				Yes (please specify which method and how often)	artificial swarm and if necessary division	Partially, breeding from the best queens should be carried out, but the other less productive colonies should not be systematically requeened	3	4	3	5	4	3	1
12217480573	392208789	4	4	national	no	no	4	4	4			Queens mated in own area		Queens bought from a pure race breeder (from Ireland)			There are occasional losses due to Varroa or viruses (10-20%/year)	Several times a year	Yes	Varroa mortality, before treatment		Varroa on bees							Yes			Approved chemical treatments in Spring/Autumn	Oxalic acid in winter							Yes (please specify which method and how often)	splits	Yes, selection (breeding only from the best queens) should be performed to have productive and healthy colonies	4	4	3	4	4	4	3
12216539674	392208789	5	4	commericial	yes	no	4	3	5			Queens mated in own area		Queens bought from a pure race breeder (from Ireland)			Varroa is a problem for me every year, but I have things under control through treatments)	Several times a year	Yes	Varroa mortality, before treatment									Yes			Approved chemical treatments in Spring/Autumn								Yes (please specify which method and how often)	in april every year, we practice artificial swarming,	Partially, breeding from the best queens should be carried out, but the other less productive colonies should not be systematically requeened	4	5	4	5	5	5	4
12213629772	392208789	6	11	national	yes	yes	4	3	5			Queens mated in own area					There are occasional losses due to Varroa or viruses (10-20%/year)	Several times a year	Yes			Varroa on bees				mite drop			I never treat for Varroa. (please specify why)	don't like chemicals, breeding for resistance/tolerance instead	I don't treat									Yes (please specify which method and how often)	splits	Partially, breeding from the best queens should be carried out, but the other less productive colonies should not be systematically requeened	3	3	3	5	5	3	5
12213355524	392208789	15	2	national	no	yes	4	5	5			Queens mated in own area					Varroa is not a problem for me (about 5% of colony losses/year due to Varroa)	Several times a year	Yes			Varroa on bees						Hygienic behaviour, other methods (freeze brood etc.)	Yes										icing sugar dusting	Yes (please specify which method and how often)	split swarm. as required	Yes, selection (breeding only from the best queens) should be performed to have productive and healthy colonies	4	4	3	5	5	3	5
12213215259	392208789	11	2	national	no	yes	1	5	5		Queens mated in own apiary	Queens mated in own area		Queens bought from a pure race breeder (from Ireland)			Varroa is a problem for me every year, but I have things under control through treatments)	All year long	Yes							mite drop, signs of varroasis			Yes										only apiguard in autumn, replace frames every year	Yes (please specify which method and how often)	artificial swarm as needed	Partially, breeding from the best queens should be carried out, but the other less productive colonies should not be systematically requeened	3	5	3	5	5	4	3
12213153307	392208789	15	10	national	yes	yes	5		5		Queens mated in own apiary			Queens bought from a pure race breeder (from Ireland)			Varroa is a problem for me every year, but I have things under control through treatments)	Once a year (spring or before treatment)	Yes		Varroa mortality, after treatment	Varroa on bees							Yes			Approved chemical treatments in Spring/Autumn	Oxalic acid in winter							Yes (please specify which method and how often)	queen is removed on sight of queen cells	Yes, selection (breeding only from the best queens) should be performed to have productive and healthy colonies	4	5	5	5	5	5	5
12213011197	392208789	5	4	poly	no	no	3	1	3			Queens mated in own area					Varroa is not a problem for me (about 5% of colony losses/year due to Varroa)	Once a year (spring or before treatment)	No	Varroa mortality, before treatment	Varroa mortality, after treatment								Yes			Approved chemical treatments in Spring/Autumn								No		No, selection should not be performed (every colony is allowed to requeen freely).	3	3	4	5	4	3	1
12212940742	392208789	20	3	commercial	yes	yes	5	3	5	they seem to adapt to our conditions better (clonroche)	Queens mated in own apiary	Queens mated in own area					Varroa is a problem for me every year, but I have things under control through treatments)	Only after treatment	Yes				Varroa in the drone brood				Hygienic behaviour (pin-test method)		Yes				Oxalic acid in winter						apiguard in autumn	Yes (please specify which method and how often)	nucs & apidea	Partially, breeding from the best queens should be carried out, but the other less productive colonies should not be systematically requeened	4	5	5	5	5	5
12212849141	392208789	5	3	national	no	yes	5	5	4							queens sources from a reliable bee keeper	There are occasional losses due to Varroa or viruses (10-20%/year)	Several times a year	Yes	Varroa mortality, before treatment			Varroa in the drone brood						Yes			Approved chemical treatments in Spring/Autumn	Oxalic acid in winter			Removing drone brood				Yes (please specify which method and how often)	bailey frame change and artificial swarms	Yes, selection (breeding only from the best queens) should be performed to have productive and healthy colonies	3	5	4	5	5	3	2
12212704575	392208789	9	6	national	yes	yes	5	5	5			Queens mated in own area					Varroa is not a problem for me (about 5% of colony losses/year due to Varroa)	All year long	No	Varroa mortality, before treatment									Yes				Oxalic acid in winter							Yes (please specify which method and how often)	queen clipped wing	Yes, selection (breeding only from the best queens) should be performed to have productive and healthy colonies	4	5	5	5	5	4	5
12212686424	392208789	2	3	national and commercial	no	yes	4	5	2			Queens mated in own area				q unknown race (ireland)	Varroa is not a problem for me (about 5% of colony losses/year due to Varroa)	Only after treatment	Yes	Varroa mortality, before treatment	Varroa mortality, after treatment								Yes			Approved chemical treatments in Spring/Autumn								Yes (please specify which method and how often)	artificial swarm 0-2/year	Yes, selection (breeding only from the best queens) should be performed to have productive and healthy colonies	4	4	5	3	3	4	1
12212591951	392208789	8	2	commercial	no	yes	5	5	5			Queens mated in own area				incl one swarm source unknown	Varroa is a problem for me every year, but I have things under control through treatments)	Several times a year	Yes							mite drop on inspection board. and occurrence of deformed wing in hive			Yes			Approved chemical treatments in Spring/Autumn								No
12212589458	392208789	6	6	commercial	yes	yes	5	5	5		Queens mated in own apiary						Varroa is not a problem for me (about 5% of colony losses/year due to Varroa)	Several times a year	Yes	Varroa mortality, before treatment	Varroa mortality, after treatment								Yes			Approved chemical treatments in Spring/Autumn								Yes (please specify which method and how often)	taking old queen out into nuc and allowing new queen emerge	Partially, breeding from the best queens should be carried out, but the other less productive colonies should not be systematically requeened	5	5	4	5	4	5	5
12212545957	392208789	2	1	poly national	no	yes	5	5	5		Queens mated in own apiary						Varroa is a serious problem for me every year (frequent losses)	Several times a year	Yes	Varroa mortality, before treatment	Varroa mortality, after treatment		Varroa in the drone brood						Yes			Approved chemical treatments in Spring/Autumn								Yes (please specify which method and how often)	splits	Yes, selection (breeding only from the best queens) should be performed to have productive and healthy colonies	5	5	5	5	5	5	5
12212475717	392208789	5	2	cdb	no	yes	5	5	5	they love pollinating my gooseberry bushes and orchard fruit.......yields have increased.	Queens mated in own apiary			Queens bought from a pure race breeder (from Ireland)			Varroa is not a problem for me (about 5% of colony losses/year due to Varroa)	Several times a year	No							we do not treat, as per guidance of fingal			Yes		I don't treat					Removing drone brood		Frequent nuc creation/requeening	fresh frames every year	Yes (please specify which method and how often)	artificial swarm control, keeping colonies small	Yes, selection (breeding only from the best queens) should be performed to have productive and healthy colonies	5	5	4	5	4	5	5
12212441373	392208789	6	5	national	no	yes	5	5	5		Queens mated in own apiary						Varroa is not a problem for me (about 5% of colony losses/year due to Varroa)	Only after treatment	Yes		Varroa mortality, after treatment						Hygienic behaviour (pin-test method)		Yes			Approved chemical treatments in Spring/Autumn								Yes (please specify which method and how often)	remove queen cells to nuc	No, selection should not be performed (every colony is allowed to requeen freely).	4	4	4	4	5	3	1
12212394903	392208789	30	40	black bee	yes	yes	5	5	3	it suits my system . i can get good amount of honey most years. even in a bad year. i have few losses in the winter. very hardy.				Queens bought from a pure race breeder (from Ireland)		got in new queens about 10 years ago from black bee breeders and have culled ever since.	Varroa is not a problem for me (about 5% of colony losses/year due to Varroa)	Several times a year	Yes	Varroa mortality, before treatment	Varroa mortality, after treatment	Varroa on bees	Varroa in the drone brood						No, I treat colonies depending on their individual infestation levels			Approved chemical treatments in Spring/Autumn				Removing drone brood			dring swarm control . when thehive has no oper brood. i put in a open frame of uncapped brood. harvest the varroa. use drone brood if i have some. get rid of it when capped.	Yes (please specify which method and how often)	about half of the hives supersead every year. demerie method/ give the queen lots of space to lay into. have two brood boxes move up sealed brood to top brood box put back down empty combs.	Partially, breeding from the best queens should be carried out, but the other less productive colonies should not be systematically requeened	5	2	5	5	3	5	5
12212381335	392208789	1	3	national	no	yes	5	5			Queens mated in own apiary	Queens mated in own area						Never	Yes										Yes				Oxalic acid in winter							Yes (please specify which method and how often)	splitting	Partially, breeding from the best queens should be carried out, but the other less productive colonies should not be systematically requeened	4	4	2	4	3	3	4
12212329403	392208789	9	4	national - using the rose hive method with national brood boxes	no	yes	4	4	5		Queens mated in own apiary						Varroa is not a problem for me (about 5% of colony losses/year due to Varroa)	Never	No							i just look for signs like deformed wing			Yes										i jsut use apiguard once a year, after honey harvest in august/early september	Yes (please specify which method and how often)	artifical splits and bait hives, between late may and mid july	No, selection should not be performed (every colony is allowed to requeen freely).	3	3	3	5	5	3	3
12211757330	392208789	18	4	commercial	no	yes		5				Queens mated in own area					Varroa is not a problem for me (about 5% of colony losses/year due to Varroa)	Once a year (spring or before treatment)	Yes			Varroa on bees				dwv			No, I treat colonies depending on their individual infestation levels			Approved chemical treatments in Spring/Autumn						Frequent nuc creation/requeening		Yes (please specify which method and how often)	artificial swarm control method or creating nucs , whenever queen cells start forming.	No, selection should not be performed (every colony is allowed to requeen freely).	3		2	5	2	3	1
12211097803	392208789	10	13	national	no	yes	3	5	4		Queens mated in own apiary						Varroa is not a problem for me (about 5% of colony losses/year due to Varroa)	Several times a year	Yes	Varroa mortality, before treatment	Varroa mortality, after treatment		Varroa in the drone brood						Yes			Approved chemical treatments in Spring/Autumn	Oxalic acid in winter			Removing drone brood				Yes (please specify which method and how often)	remove queen to nuc, leaving 1 qc.	Yes, selection (breeding only from the best queens) should be performed to have productive and healthy colonies	4	5	3	5	4	5
12210930549	392208789	5	10	national	no	i don't know					Queens mated in own apiary
12210896865	392208789	3	3	national	no	yes	5	5	5			Queens mated in own area					There are occasional losses due to Varroa or viruses (10-20%/year)	Several times a year	No					Varroa in the worker brood					No, I treat colonies depending on their individual infestation levels			Approved chemical treatments in Spring/Autumn								Yes (please specify which method and how often)	weekly inspections	Yes, selection (breeding only from the best queens) should be performed to have productive and healthy colonies	4	4	4	5	5	4	4
12210858586	392208789	3	6	national, timber hive	no	yes	2	5	3		Queens mated in own apiary	Queens mated in own area					Varroa is not a problem for me (about 5% of colony losses/year due to Varroa)	Never	Yes							don't look	Hygienic behaviour (pin-test method)		Yes										apiguard	Yes (please specify which method and how often)	i try to anyway	Partially, breeding from the best queens should be carried out, but the other less productive colonies should not be systematically requeened	5	4	2	3	2	3	3
12210844598	392208789	1	1	commercial hive	yes	yes	5	5	5			Queens mated in own area
12210787080	392208789	8	4	commercial	no	yes	5	1	5		Queens mated in own apiary	Queens mated in own area					Varroa is not a problem for me (about 5% of colony losses/year due to Varroa)	Several times a year	No	Varroa mortality, before treatment		Varroa on bees							Yes		I don't treat									Yes (please specify which method and how often)	as
12210783501	392208789	10	6	commercial	no	yes	5	5	5		Queens mated in own apiary						Varroa is a problem for me every year, but I have things under control through treatments)	Once a year (spring or before treatment)	No			Varroa on bees	Varroa in the drone brood						Yes				Oxalic acid in winter							No		Partially, breeding from the best queens should be carried out, but the other less productive colonies should not be systematically requeened	5	4	3	5	5	4	5
12210744602	392208789	14	24	national	no	i don't know	1	1	1		Queens mated in own apiary						Varroa is a problem for me every year, but I have things under control through treatments)	Several times a year	Yes	Varroa mortality, before treatment	Varroa mortality, after treatment		Varroa in the drone brood						Yes			Approved chemical treatments in Spring/Autumn	Oxalic acid in winter							Yes (please specify which method and how often)	artificial swarm control, splitting	Partially, breeding from the best queens should be carried out, but the other less productive colonies should not be systematically requeened	4	5	2	5	4	4	2
12210716678	392208789	1	1	national	no	yes	4	4	5			Queens mated in own area					There are occasional losses due to Varroa or viruses (10-20%/year)	All year long	Yes					Varroa in the worker brood					I never treat for Varroa. (please specify why)	fbka don't treat	I don't treat											Yes, selection (breeding only from the best queens) should be performed to have productive and healthy colonies	5	5	5	5	5	5	5
12210702211	392208789	2	1	commercial	no	yes	5	5	5			Queens mated in own area					Varroa is not a problem for me (about 5% of colony losses/year due to Varroa)	All year long	No							healthy bees and little signs of bee viruses			I never treat for Varroa. (please specify why)	it is the policy of fndbka	I don't treat									Yes (please specify which method and how often)	still only learning beekeeping basics	Partially, breeding from the best queens should be carried out, but the other less productive colonies should not be systematically requeened	4	4	4	4	4	5	3
12210669393	392208789	6	15	commercial	yes	yes	3	4	5		Queens mated in own apiary	Queens mated in own area					Varroa is not a problem for me (about 5% of colony losses/year due to Varroa)	Several times a year	Yes		Varroa mortality, after treatment		Varroa in the drone brood						Yes						Oxalic acid combined with brood interruption (nuc creation)					Yes (please specify which method and how often)	nuc	Yes, selection (breeding only from the best queens) should be performed to have productive and healthy colonies	4	4	5	5	4	5	3
12210653464	392208789	31	63	polys	no	yes	3	1	3		Queens mated in own apiary						Varroa is not a problem for me (about 5% of colony losses/year due to Varroa)	Never	No							observe level of dropped mites			I never treat for Varroa. (please specify why)	seems to build a better colony quickly	I don't treat									No		No, selection should not be performed (every colony is allowed to requeen freely).	3	5	1	3	4	5	4
12210601783	392208789	5	1	national	yes	yes	4	3	5	a beekeeper had a hive on our land (non-native) but they collapsed one winter. a friend had native honeybees and offered us a swarm. they are much less aggressive and we hope they will be more resistant to disease.						a swarm brought by a friend.	Varroa is not a problem for me (about 5% of colony losses/year due to Varroa)	Several times a year	Yes							visual inspection with magnifying devices. we have not yet needed to treat.			No, I treat colonies depending on their individual infestation levels		I don't treat									No		No, selection should not be performed (every colony is allowed to requeen freely).	4	5	4	5	5	5	4
12210410851	392208789	1	2	langstrong	no	yes	5	5	5			Queens mated in own area	Own queens mated at a particular mating station				Varroa is not a problem for me (about 5% of colony losses/year due to Varroa)	Several times a year	No				Varroa in the drone brood	Varroa in the worker brood					I never treat for Varroa. (please specify why)	no evidence	I don't treat									No		No, selection should not be performed (every colony is allowed to requeen freely).	3	3	3	3	4	3	5
12210248319	392208789	4	6	national wooden and poly and poly nucs	yes	yes	5	1	5					Queens bought from a pure race breeder (from Ireland)		three queens arrived in a swarm and moved into empty hives in my apiary. three were bought from another beekeeper who ony keeps native dark bees.		Several times a year	No				Varroa in the drone brood	Varroa in the worker brood		i have never treated.			I never treat for Varroa. (please specify why)	i have never treated my bees. all my colonies in 2019, i.e. seven, were wiped out by wasps at the end of the year. there were fewer wasps this year and although all my colonies were either swarms or splits they have survived so far.	I don't treat								i have apigard, but have never seen the need to use it.	No		Partially, breeding from the best queens should be carried out, but the other less productive colonies should not be systematically requeened	3	5	3	5	4	2	5
12210224438	392208789	7	8	national	no	yes	3	3	5		Queens mated in own apiary	Queens mated in own area					Varroa is a problem for me every year, but I have things under control through treatments)	Several times a year	Yes	Varroa mortality, before treatment	Varroa mortality, after treatment	Varroa on bees	Varroa in the drone brood	Varroa in the worker brood					Yes			Approved chemical treatments in Spring/Autumn								Yes (please specify which method and how often)	removing queen, doing splits,	Yes, selection (breeding only from the best queens) should be performed to have productive and healthy colonies	4	5	5	5	5	5	3
12209576711	392208789	10	2	national	no	yes	5	2	5			Queens mated in own area				nuc from a friend in next county	There are occasional losses due to Varroa or viruses (10-20%/year)	Several times a year	Yes	Varroa mortality, before treatment	Varroa mortality, after treatment	Varroa on bees		Varroa in the worker brood					No, I treat colonies depending on their individual infestation levels		I don't treat					Removing drone brood			apiguard if needed	No		No, selection should not be performed (every colony is allowed to requeen freely).	3	5	4	4	4	5	4
12209479269	392208789	12	19	national, national deeps and commercial	no	yes	4	5	5		Queens mated in own apiary	Queens mated in own area		Queens bought from a pure race breeder (from Ireland)			Varroa is not a problem for me (about 5% of colony losses/year due to Varroa)	Several times a year	Yes	Varroa mortality, before treatment			Varroa in the drone brood			regularly put sheets under open mesh floors			Yes			Approved chemical treatments in Spring/Autumn				Removing drone brood				Yes (please specify which method and how often)	mark and clip queens, regular inspections	Yes, selection (breeding only from the best queens) should be performed to have productive and healthy colonies	4	4	4	5	4	4	4
12209476916	392208789	14	100	langstroth, national, commercial	no	yes	3	4	3		Queens mated in own apiary		Own queens mated at a particular mating station				There are occasional losses due to Varroa or viruses (10-20%/year)	All year long	No		Varroa mortality, after treatment		Varroa in the drone brood			varroa linked disease			Yes			Approved chemical treatments in Spring/Autumn	Oxalic acid in winter							Yes (please specify which method and how often)	remove the queen at the first sign of swarming	Yes, selection (breeding only from the best queens) should be performed to have productive and healthy colonies	5	5	5	5	3	4	4
12209333826	392208789	12	2	commercial	no	yes	5	1	5		Queens mated in own apiary	Queens mated in own area						All year long	Yes						Reproduction of Varroa	check for varroa visible on bees.			I never treat for Varroa. (please specify why)	i do not have a varroa problem	I don't treat									Yes (please specify which method and how often)	7-10 day checks creating nucs when queen cells are present	No, selection should not be performed (every colony is allowed to requeen freely).	4	4	3	5	5	4	5
12209297036	392208789	5	4	national (wooden)	yes	i don't know	3	4	4		Queens mated in own apiary						Varroa is not a problem for me (about 5% of colony losses/year due to Varroa)	Several times a year	Yes	Varroa mortality, before treatment	Varroa mortality, after treatment								Yes			Approved chemical treatments in Spring/Autumn	Oxalic acid in winter							Yes (please specify which method and how often)	split hives, swarm control technique by removing queen and frame, leave i metre from hive then move other side after 1 week. i dont clip wings	Partially, breeding from the best queens should be carried out, but the other less productive colonies should not be systematically requeened	4	4	4	4	4	3	3
12209277015	392208789	3	4	top bar hives	no	yes	5	5	5		Queens mated in own apiary	Queens mated in own area					Varroa is not a problem for me (about 5% of colony losses/year due to Varroa)	All year long	Yes		Varroa mortality, after treatment	Varroa on bees	Varroa in the drone brood						No, I treat colonies depending on their individual infestation levels							Removing drone brood			sugar dasting	Yes (please specify which method and how often)	splitting the colonies, removing all the queen cells except one
12209213179	392208789	1	2	national(cedar)	no	yes	5	3	5			Queens mated in own area		Queens bought from a pure race breeder (from Ireland)			Varroa is a problem for me every year, but I have things under control through treatments)	Several times a year	Yes	Varroa mortality, before treatment	Varroa mortality, after treatment								Yes			Approved chemical treatments in Spring/Autumn	Oxalic acid in winter			Removing drone brood				Yes (please specify which method and how often)	nucleus method	Yes, selection (breeding only from the best queens) should be performed to have productive and healthy colonies	3	3	2	4	4	4	4
12208758920	392208789	10	12	jumbo national	yes	yes		5	5		Queens mated in own apiary					exchange the odd q with other beekeepers	Varroa is not a problem for me (about 5% of colony losses/year due to Varroa)	Once a year (spring or before treatment)	Yes				Varroa in the drone brood			count mite drop			Yes			Approved chemical treatments in Spring/Autumn								Yes (please specify which method and how often)	q cell selection & removal of surplus	Yes, selection (breeding only from the best queens) should be performed to have productive and healthy colonies		5	3				5
12208687154	392208789	1	1	national	no	yes	5	5	5			Queens mated in own area					There are occasional losses due to Varroa or viruses (10-20%/year)	Once a year (spring or before treatment)	No			Varroa on bees	Varroa in the drone brood	Varroa in the worker brood				Hygienic behaviour, other methods (freeze brood etc.)	Yes			Approved chemical treatments in Spring/Autumn								Yes (please specify which method and how often)	split hive	Partially, breeding from the best queens should be carried out, but the other less productive colonies should not be systematically requeened	3	4	3	3	3	5	5
12208544622	392208789	40	30	national	yes	yes	5	5	5		Queens mated in own apiary			Queens bought from a pure race breeder (from Ireland)			There are occasional losses due to Varroa or viruses (10-20%/year)	Never	Yes			Varroa on bees	Varroa in the drone brood						Yes			Approved chemical treatments in Spring/Autumn								Yes (please specify which method and how often)	requeen	Yes, selection (breeding only from the best queens) should be performed to have productive and healthy colonies	5	4	4	5	5	5	5
12208111285	392208789	3	0	top bar and national	yes	yes	3	3	5					Queens bought from a pure race breeder (from Ireland)			Varroa is not a problem for me (about 5% of colony losses/year due to Varroa)	Several times a year	No				Varroa in the drone brood	Varroa in the worker brood			Hygienic behaviour (pin-test method)		I never treat for Varroa. (please specify why)	not much of a problem so far	I don't treat									No		Partially, breeding from the best queens should be carried out, but the other less productive colonies should not be systematically requeened	3	5	3	5	5	5	5
12208074606	392208789	4	16	national	yes	yes	5	5	5	i think i have one hive of a mix of irish honey bee and the buckfast bee. i have same queen for 3 years never tried to swarm and no sign of mites haven't treated them in 2 years, great honey producers box always full of bees all year round ,aggressive	Queens mated in own apiary			Queens bought from a pure race breeder (from Ireland)			Varroa is not a problem for me (about 5% of colony losses/year due to Varroa)	Several times a year	Yes	Varroa mortality, before treatment	Varroa mortality, after treatment	Varroa on bees	Varroa in the drone brood		Reproduction of Varroa			Hygienic behaviour, other methods (freeze brood etc.)	No, I treat colonies depending on their individual infestation levels										apivra	Yes (please specify which method and how often)	only on hives i want to breed my queens from	Yes, selection (breeding only from the best queens) should be performed to have productive and healthy colonies	5	3	3	5	5	4	2
12208020287	392208789	2	3	national payne’s poly	yes	yes	5	1	5			Queens mated in own area		Queens bought from a pure race breeder (from Ireland)			Varroa is a problem for me every year, but I have things under control through treatments)	Several times a year	Yes		Varroa mortality, after treatment								No, I treat colonies depending on their individual infestation levels			Approved chemical treatments in Spring/Autumn	Oxalic acid in winter							Yes (please specify which method and how often)	artificial swerm	Yes, selection (breeding only from the best queens) should be performed to have productive and healthy colonies	3	4	3	5	5	4	5
12207937770	392208789	3	7	national	yes	yes	5	3	5			Queens mated in own area					Varroa is a problem for me every year, but I have things under control through treatments)	Several times a year	Yes	Varroa mortality, before treatment	Varroa mortality, after treatment								Yes				Oxalic acid in winter							Yes (please specify which method and how often)	artificial swarm	Partially, breeding from the best queens should be carried out, but the other less productive colonies should not be systematically requeened	3	4	3	4	4	3	4
12207714252	392208789	4	3	payne’s poly	no	yes	5	5	5			Queens mated in own area					Varroa is not a problem for me (about 5% of colony losses/year due to Varroa)	Several times a year	Yes	Varroa mortality, before treatment	Varroa mortality, after treatment								Yes			Approved chemical treatments in Spring/Autumn	Oxalic acid in winter							Yes (please specify which method and how often)	artificial swarm	Yes, selection (breeding only from the best queens) should be performed to have productive and healthy colonies	4	4	4	4	5	5	5
12207655298	392208789	10	12	national	no	yes	1	1	1			Queens mated in own area					Varroa is not a problem for me (about 5% of colony losses/year due to Varroa)	All year long	No	Varroa mortality, before treatment	Varroa mortality, after treatment	Varroa on bees	Varroa in the drone brood	Varroa in the worker brood	Reproduction of Varroa				Yes			Approved chemical treatments in Spring/Autumn	Oxalic acid in winter							Yes (please specify which method and how often)	remove queen during swarming season in may	No, selection should not be performed (every colony is allowed to requeen freely).	5	3	3	5	3	2	1
12207643559	392208789	4	1	commercial	no	yes	5	5	5			Queens mated in own area					There are occasional losses due to Varroa or viruses (10-20%/year)	All year long	Yes	Varroa mortality, before treatment	Varroa mortality, after treatment		Varroa in the drone brood	Varroa in the worker brood				Hygienic behaviour, other methods (freeze brood etc.)	Yes			Approved chemical treatments in Spring/Autumn				Removing drone brood				Yes (please specify which method and how often)	artificial each summer
12207595096	392208789	2	5	bs	no	yes	5	5	5			Queens mated in own area					Varroa is a problem for me every year, but I have things under control through treatments)	Several times a year	Yes	Varroa mortality, before treatment	Varroa mortality, after treatment								No, I treat colonies depending on their individual infestation levels		I don't treat	Approved chemical treatments in Spring/Autumn								Yes (please specify which method and how often)	splits
12207436990	392208789	7	4	national	yes	yes	4	4	5		Queens mated in own apiary					all hives populated by swarms, hopefully wild!	Varroa is not a problem for me (about 5% of colony losses/year due to Varroa)	Several times a year	No							no treatment for varrow for 3 years			I never treat for Varroa. (please specify why)	i don't want any queens whose workers cannot handle it	I don't treat									No		Yes, selection (breeding only from the best queens) should be performed to have productive and healthy colonies	2	3	2	4	5	2	5
12207279195	392208789	3	2	national	no	yes	5	1	5			Queens mated in own area					There are occasional losses due to Varroa or viruses (10-20%/year)	Never	No				Varroa in the drone brood						I never treat for Varroa. (please specify why)	haven’t stated and don’t like using chemicals	I don't treat									No		No, selection should not be performed (every colony is allowed to requeen freely).	3	4	3	4	4	4	4
12207051649	392208789	6	8	national (poly)	no	yes	5	5	5		Queens mated in own apiary					queens given from other beekeeper outside my area	Varroa is a problem for me every year, but I have things under control through treatments)	Several times a year	Yes	Varroa mortality, before treatment	Varroa mortality, after treatment								Yes			Approved chemical treatments in Spring/Autumn	Oxalic acid in winter							Yes (please specify which method and how often)	queen and a small amount of bees removed when queen cells appear
12206956102	392208789	4	7	commercial and national, wood and poly	yes	yes			5		Queens mated in own apiary			Queens bought from a pure race breeder (from Ireland)			Varroa is not a problem for me (about 5% of colony losses/year due to Varroa)	All year long	Yes		Varroa mortality, after treatment		Varroa in the drone brood						Yes			Approved chemical treatments in Spring/Autumn								Yes (please specify which method and how often)	artificial swarm	Yes, selection (breeding only from the best queens) should be performed to have productive and healthy colonies	2		4	4	4	4	5
12206692289	392208789	2	3	poly and cedar	no	yes	4	4	5			Queens mated in own area		Queens bought from a pure race breeder (from Ireland)			Varroa is not a problem for me (about 5% of colony losses/year due to Varroa)	Several times a year	Yes	Varroa mortality, before treatment			Varroa in the drone brood	Varroa in the worker brood					Yes			Approved chemical treatments in Spring/Autumn								Yes (please specify which method and how often)	artificial swarm	No, selection should not be performed (every colony is allowed to requeen freely).	4	4	4	5	5	4	4
12206585261	392208789	1	1	national	no	yes	5	5	5			Queens mated in own area					Varroa is not a problem for me (about 5% of colony losses/year due to Varroa)	Only after treatment	No	Varroa mortality, before treatment	Varroa mortality, after treatment						Hygienic behaviour (pin-test method)		Yes			Approved chemical treatments in Spring/Autumn								No		Partially, breeding from the best queens should be carried out, but the other less productive colonies should not be systematically requeened	3	5	4	5	4	4	3
12206549239	392208789	4	4	national (poly)	no	yes	5	3	5			Queens mated in own area					Varroa is not a problem for me (about 5% of colony losses/year due to Varroa)	Several times a year	No	Varroa mortality, before treatment			Varroa in the drone brood	Varroa in the worker brood	Reproduction of Varroa				I never treat for Varroa. (please specify why)	i do not use chemicals on bees or on my land	I don't treat									No		Partially, breeding from the best queens should be carried out, but the other less productive colonies should not be systematically requeened	4	3	3	5	5	3	3
12206488302	392208789	1	5	national	no	yes	5	5	5		Queens mated in own apiary						There are occasional losses due to Varroa or viruses (10-20%/year)	Several times a year	Yes		Varroa mortality, after treatment		Varroa in the drone brood						Yes			Approved chemical treatments in Spring/Autumn				Removing drone brood				Yes (please specify which method and how often)	artificial swarm method
12206398710	392208789	1	2	national	no	yes	5	5	5		Queens mated in own apiary						Varroa is a problem for me every year, but I have things under control through treatments)	Only after treatment	Yes		Varroa mortality, after treatment								Yes			Approved chemical treatments in Spring/Autumn								Yes (please specify which method and how often)	kill emerging queen cells when i see them	Partially, breeding from the best queens should be carried out, but the other less productive colonies should not be systematically requeened	3	5	4	5	5	5	4
12206241171	392208789	2	6	national	yes	yes	5	5	5					Queens bought from a pure race breeder (from Ireland)			Varroa is not a problem for me (about 5% of colony losses/year due to Varroa)	Several times a year	Yes	Varroa mortality, before treatment	Varroa mortality, after treatment		Varroa in the drone brood						Yes			Approved chemical treatments in Spring/Autumn								Yes (please specify which method and how often)	artificial swarm	Yes, selection (breeding only from the best queens) should be performed to have productive and healthy colonies	4	4	4	5	5	4	5
12206173002	392208789	15	20	langstroth	no	i don't know	3	3		i have the local bees i got first day when i started	Queens mated in own apiary	Queens mated in own area					Varroa is a serious problem for me every year (frequent losses)	Several times a year	Yes	Varroa mortality, before treatment	Varroa mortality, after treatment		Varroa in the drone brood						Yes			Approved chemical treatments in Spring/Autumn	Oxalic acid in winter	Oxalic acid combined with brood interruption (queen cages in summer)						Yes (please specify which method and how often)	padggen	Partially, breeding from the best queens should be carried out, but the other less productive colonies should not be systematically requeened	5	3	3	5	3	3	1
12205658025	392208789	40	12	national wooden	yes	yes	5		5		Queens mated in own apiary						Varroa is not a problem for me (about 5% of colony losses/year due to Varroa)	Once a year (spring or before treatment)	No		Varroa mortality, after treatment	Varroa on bees	Varroa in the drone brood						Yes			Approved chemical treatments in Spring/Autumn	Oxalic acid in winter							Yes (please specify which method and how often)	demaree with queen removal	Yes, selection (breeding only from the best queens) should be performed to have productive and healthy colonies	2	5	3	5	5	5	5
12205623777	392208789	3	5	national	yes	yes	5	5	5		Queens mated in own apiary						Varroa is a problem for me every year, but I have things under control through treatments)	Once a year (spring or before treatment)	Yes				Varroa in the drone brood					Hygienic behaviour, other methods (freeze brood etc.)	Yes			Approved chemical treatments in Spring/Autumn								Yes (please specify which method and how often)	by doing spilts	Yes, selection (breeding only from the best queens) should be performed to have productive and healthy colonies	5	5	5	5	5	5	5
12205617539	392208789	7	180	langstroth	no	yes	3	5	1		Queens mated in own apiary						Varroa is not a problem for me (about 5% of colony losses/year due to Varroa)	Several times a year	Yes				Varroa in the drone brood			alcohol wash			Yes			Approved chemical treatments in Spring/Autumn	Oxalic acid in winter							Yes (please specify which method and how often)	artificial swarm to flight board	Yes, selection (breeding only from the best queens) should be performed to have productive and healthy colonies	5	5	5	5	4	4	1
12205607582	392208789	12	14	national	no	yes	3	2	2					Queens bought from a pure race breeder (from Ireland)			Varroa is not a problem for me (about 5% of colony losses/year due to Varroa)	Several times a year	No		Varroa mortality, after treatment								Yes				Oxalic acid in winter						amitraz in autumn	Yes (please specify which method and how often)	take queen away	Yes, selection (breeding only from the best queens) should be performed to have productive and healthy colonies	5	2	4	3	2	2	2
12205571522	392208789	8	10	poly	no	yes	5	4	5			Queens mated in own area		Queens bought from a pure race breeder (from Ireland)			Varroa is not a problem for me (about 5% of colony losses/year due to Varroa)	Several times a year	Yes				Varroa in the drone brood	Varroa in the worker brood					Yes				Oxalic acid in winter							Yes (please specify which method and how often)	artifical swarm.	Yes, selection (breeding only from the best queens) should be performed to have productive and healthy colonies	4	5	3	5	3	4	4
12205558442	392208789	10	15	poly	yes	yes	5	4	5		Queens mated in own apiary	Queens mated in own area					Varroa is a problem for me every year, but I have things under control through treatments)	Several times a year	Yes	Varroa mortality, before treatment	Varroa mortality, after treatment		Varroa in the drone brood						No, I treat colonies depending on their individual infestation levels			Approved chemical treatments in Spring/Autumn	Oxalic acid in winter			Removing drone brood				Yes (please specify which method and how often)	artifical swarm once per year	Partially, breeding from the best queens should be carried out, but the other less productive colonies should not be systematically requeened	4	4	4	5	4	3	3
12205547782	392208789	34	173	national and commercial	yes	yes	5	5	5		Queens mated in own apiary	Queens mated in own area					There are occasional losses due to Varroa or viruses (10-20%/year)	Several times a year	Yes	Varroa mortality, before treatment	Varroa mortality, after treatment	Varroa on bees	Varroa in the drone brood		Reproduction of Varroa		Hygienic behaviour (pin-test method)		No, I treat colonies depending on their individual infestation levels		I don't treat	Approved chemical treatments in Spring/Autumn	Oxalic acid in winter			Removing drone brood	Total brood removal if necessary	Frequent nuc creation/requeening		Yes (please specify which method and how often)	artificial swarms, sequencing, destruction of queen cells	Partially, breeding from the best queens should be carried out, but the other less productive colonies should not be systematically requeened	5	5	3	5	4	3	5
12205532733	392208789	5	8	langstroth poly	no	yes	2	5	2			Queens mated in own area					There are occasional losses due to Varroa or viruses (10-20%/year)	Several times a year	Yes	Varroa mortality, before treatment	Varroa mortality, after treatment		Varroa in the drone brood						Yes			Approved chemical treatments in Spring/Autumn	Oxalic acid in winter							Yes (please specify which method and how often)	split hives	Partially, breeding from the best queens should be carried out, but the other less productive colonies should not be systematically requeened	4	4	4	4	3	3	1
12205531933	392208789	5	4	national	no	yes	5	1	5					Queens bought from a pure race breeder (from Ireland)			There are occasional losses due to Varroa or viruses (10-20%/year)	Only after treatment	Yes		Varroa mortality, after treatment	Varroa on bees	Varroa in the drone brood			deformities	Hygienic behaviour (pin-test method)		Yes			Approved chemical treatments in Spring/Autumn								Yes (please specify which method and how often)	split colonies	Yes, selection (breeding only from the best queens) should be performed to have productive and healthy colonies	4	5	5	5	5	4	3
12205501027	392208789	3	4	national	no	yes		5	5			Queens mated in own area					There are occasional losses due to Varroa or viruses (10-20%/year)	Several times a year	Yes	Varroa mortality, before treatment	Varroa mortality, after treatment								No, I treat colonies depending on their individual infestation levels			Approved chemical treatments in Spring/Autumn								Yes (please specify which method and how often)	artificial swarm	Partially, breeding from the best queens should be carried out, but the other less productive colonies should not be systematically requeened	3	4	4	5	5	4	4
12205488124	392208789		2	maisemore poly	yes	yes	5	5	5		Queens mated in own apiary							Only after treatment	Yes		Varroa mortality, after treatment								Yes			Approved chemical treatments in Spring/Autumn										Partially, breeding from the best queens should be carried out, but the other less productive colonies should not be systematically requeened	3	4	5	4	3	3	5
12205483083	392208789	6	12	14x12 national	yes	yes	4	1	5		Queens mated in own apiary			Queens bought from a pure race breeder (from Ireland)			Varroa is not a problem for me (about 5% of colony losses/year due to Varroa)	Several times a year	Yes	Varroa mortality, before treatment	Varroa mortality, after treatment		Varroa in the drone brood						No, I treat colonies depending on their individual infestation levels						Oxalic acid combined with brood interruption (nuc creation)	Removing drone brood				Yes (please specify which method and how often)	queen out in nuc	Partially, breeding from the best queens should be carried out, but the other less productive colonies should not be systematically requeened	3	3	3	5	4	4	4
12205461747	392208789	35		national and commercial	yes	yes	5	5	5			Queens mated in own area					Varroa is not a problem for me (about 5% of colony losses/year due to Varroa)	Only after treatment	Yes		Varroa mortality, after treatment							Hygienic behaviour, other methods (freeze brood etc.)	Yes				Oxalic acid in winter							Yes (please specify which method and how often)	remove queen	Yes, selection (breeding only from the best queens) should be performed to have productive and healthy colonies	5	5	3	5	3	5	5
12205451999	392208789	7	4	national	yes	yes	5	5	5	thrifty in winter, survivors of poor weather						brought through from different local and imported galtee mountain stock, swarms from east limerick	There are occasional losses due to Varroa or viruses (10-20%/year)	Several times a year	Yes	Varroa mortality, before treatment			Varroa in the drone brood			dwv			Yes			Approved chemical treatments in Spring/Autumn				Removing drone brood			min drone removal, first year going treatment free, mainly pyrethoid treatments and a number of years in apiguard.	Yes (please specify which method and how often)	space, queen cell removal, nuc production from good stock, lure hives	Partially, breeding from the best queens should be carried out, but the other less productive colonies should not be systematically requeened	2	3	3	4	4	4	3
12205439242	392208789	1	10	national, poly	yes	yes	5	2	5		Queens mated in own apiary			Queens bought from a pure race breeder (from Ireland)			Varroa is not a problem for me (about 5% of colony losses/year due to Varroa)	Once a year (spring or before treatment)	Yes			Varroa on bees	Varroa in the drone brood						Yes			Approved chemical treatments in Spring/Autumn	Oxalic acid in winter			Removing drone brood				Yes (please specify which method and how often)	artificial swarm; making nice from frames containing swarm cells; as required.	Partially, breeding from the best queens should be carried out, but the other less productive colonies should not be systematically requeened	4	4	1	5	4	3	5
12205425035	392208789	10	50	national	yes	yes	5	4	5		Queens mated in own apiary			Queens bought from a pure race breeder (from Ireland)			Varroa is not a problem for me (about 5% of colony losses/year due to Varroa)	Several times a year	Yes	Varroa mortality, before treatment	Varroa mortality, after treatment								Yes			Approved chemical treatments in Spring/Autumn	Oxalic acid in winter							Yes (please specify which method and how often)	queen removal in nucs on second round of queen cells,	Yes, selection (breeding only from the best queens) should be performed to have productive and healthy colonies	4	4	4	5	4	4	4
12205415285	392208789	2	3	native irish	yes	yes	5	4	5			Queens mated in own area					There are occasional losses due to Varroa or viruses (10-20%/year)	Once a year (spring or before treatment)	No			Varroa on bees							Yes			Approved chemical treatments in Spring/Autumn								No		Yes, selection (breeding only from the best queens) should be performed to have productive and healthy colonies	2	3	3	5	4	3	4
12205357348	392208789	2	4	national	no	yes	1	1	5					Queens bought from a pure race breeder (from Ireland)			Varroa is not a problem for me (about 5% of colony losses/year due to Varroa)	Once a year (spring or before treatment)			Varroa mortality, after treatment								Yes			Approved chemical treatments in Spring/Autumn								Yes (please specify which method and how often)	start nucs with the queen cell frame and collapse queen cells	Yes, selection (breeding only from the best queens) should be performed to have productive and healthy colonies	3	4	4	5	3	3	5
12205356359	392208789	5	17	national	yes	yes	5	4	5			Queens mated in own area		Queens bought from a pure race breeder (from Ireland)			Varroa is not a problem for me (about 5% of colony losses/year due to Varroa)	All year long	Yes	Varroa mortality, before treatment	Varroa mortality, after treatment	Varroa on bees	Varroa in the drone brood						Yes			Approved chemical treatments in Spring/Autumn	Oxalic acid in winter							Yes (please specify which method and how often)	nuc method queen removal	Yes, selection (breeding only from the best queens) should be performed to have productive and healthy colonies	3	5	5	5	4	4	5
12205355086	392208789	3	6	commercial hives	no	yes	3	3	5			Queens mated in own area
12205350415	392208789	2	0	national	yes	yes	5	5	5							swarm moved in	There are occasional losses due to Varroa or viruses (10-20%/year)	Once a year (spring or before treatment)	Yes	Varroa mortality, before treatment			Varroa in the drone brood						No, I treat colonies depending on their individual infestation levels			Approved chemical treatments in Spring/Autumn								No		Partially, breeding from the best queens should be carried out, but the other less productive colonies should not be systematically requeened	3	5	5	5	4	5	3
12205335641	392208789	2	4	national	no	yes	3	5	3	have dark bees but also have some striped ones. just whatever breeding they were when i was starting off		Queens mated in own area					Varroa is not a problem for me (about 5% of colony losses/year due to Varroa)	All year long	Yes	Varroa mortality, before treatment	Varroa mortality, after treatment		Varroa in the drone brood						Yes				Oxalic acid in winter			Removing drone brood				Yes (please specify which method and how often)	put existing queen into a nuc when i see queen cups	Yes, selection (breeding only from the best queens) should be performed to have productive and healthy colonies	3	5	5	5	3	4	1
12205327270	392208789	2	2	commercial	no	yes	5	5	5		Queens mated in own apiary						Varroa is a serious problem for me every year (frequent losses)	Never	No							don’t inspect			Yes		I don't treat									Yes (please specify which method and how often)	tear down of queen cells	No, selection should not be performed (every colony is allowed to requeen freely).	2	2	1	5	5	1	1
12205326838	392208789	1	2	national	no	yes	5	5	5		Queens mated in own apiary						Varroa is not a problem for me (about 5% of colony losses/year due to Varroa)	Only after treatment	No			Varroa on bees	Varroa in the drone brood	Varroa in the worker brood					Yes			Approved chemical treatments in Spring/Autumn								Yes (please specify which method and how often)	clip queens, splits	Partially, breeding from the best queens should be carried out, but the other less productive colonies should not be systematically requeened	4	5	5	5	5	5	5
12205325223	392208789	2	1	warre	no	yes	5	1	5					Queens bought from a pure race breeder (from Ireland)			Varroa is not a problem for me (about 5% of colony losses/year due to Varroa)	Several times a year	No			Varroa on bees							No, I treat colonies depending on their individual infestation levels				Oxalic acid in winter							No		Yes, selection (breeding only from the best queens) should be performed to have productive and healthy colonies	1	2	2	5	5	3	5
12205323101	392208789	6	9	national	no	yes	5	5	5		Queens mated in own apiary						Varroa is not a problem for me (about 5% of colony losses/year due to Varroa)	Several times a year	No							deformed wings			Yes			Approved chemical treatments in Spring/Autumn	Oxalic acid in winter			Removing drone brood				Yes (please specify which method and how often)	double brood	Partially, breeding from the best queens should be carried out, but the other less productive colonies should not be systematically requeened	3	5	4	5	5	5	5
12205322617	392208789	7	25	national	no	yes	3	5	5		Queens mated in own apiary	Queens mated in own area
12205319494	392208789	1	2	national	yes	yes	3	3	5					Queens bought from a pure race breeder (from Ireland)			Varroa is not a problem for me (about 5% of colony losses/year due to Varroa)	Once a year (spring or before treatment)	No		Varroa mortality, after treatment								Yes			Approved chemical treatments in Spring/Autumn								No		Partially, breeding from the best queens should be carried out, but the other less productive colonies should not be systematically requeened	3	4	4	4	4	4	3
12205311726	392208789	3	11	national	no	yes	4	4	4			Queens mated in own area		Queens bought from a pure race breeder (from Ireland)			Varroa is a problem for me every year, but I have things under control through treatments)	Several times a year	Yes		Varroa mortality, after treatment								Yes			Approved chemical treatments in Spring/Autumn	Oxalic acid in winter							Yes (please specify which method and how often)	split
12205308941	392208789	14	550	langstroth	no	no	1	1	1	poor bee for large scale management	Queens mated in own apiary	Queens mated in own area	Own queens mated at a particular mating station		Queens bought from a pure race breeder (from other countries)		Varroa is not a problem for me (about 5% of colony losses/year due to Varroa)	All year long	No			Varroa on bees	Varroa in the drone brood	Varroa in the worker brood					Yes			Approved chemical treatments in Spring/Autumn	Oxalic acid in winter							Yes (please specify which method and how often)	prevent it starting (space, good genetics, taking some bees/brood) rather than a reaction to queen cells	Yes, selection (breeding only from the best queens) should be performed to have productive and healthy colonies	5	4	5	4	4	5	1
12205307119	392208789	7	10	national commercial and poly	yes	yes	5	5	5			Queens mated in own area					Varroa is not a problem for me (about 5% of colony losses/year due to Varroa)	Several times a year	Yes	Varroa mortality, before treatment			Varroa in the drone brood						Yes			Approved chemical treatments in Spring/Autumn				Removing drone brood				Yes (please specify which method and how often)	clipped queens and nucleus method	Partially, breeding from the best queens should be carried out, but the other less productive colonies should not be systematically requeened	4	5	3	4	2	4	5
12205302906	392208789	1	1	national	yes	yes	5	5	5		Queens mated in own apiary						Varroa is not a problem for me (about 5% of colony losses/year due to Varroa)	All year long	Yes	Varroa mortality, before treatment								Hygienic behaviour, other methods (freeze brood etc.)	No, I treat colonies depending on their individual infestation levels			Approved chemical treatments in Spring/Autumn								No		No, selection should not be performed (every colony is allowed to requeen freely).	4	5	3	5	5	5	5
12205294400	392208789	40	95	commercial	yes	yes	5	5	5		Queens mated in own apiary	Queens mated in own area					There are occasional losses due to Varroa or viruses (10-20%/year)	Several times a year	No		Varroa mortality, after treatment		Varroa in the drone brood						Yes			Approved chemical treatments in Spring/Autumn	Oxalic acid in winter							Yes (please specify which method and how often)	q marked and 14 day inspections	Yes, selection (breeding only from the best queens) should be performed to have productive and healthy colonies	4	4	4	4	4	4	3
12205294313	392208789	5	35	national poly	yes	yes	5	5	5				Own queens mated at a particular mating station	Queens bought from a pure race breeder (from Ireland)			There are occasional losses due to Varroa or viruses (10-20%/year)	Several times a year	Yes	Varroa mortality, before treatment	Varroa mortality, after treatment	Varroa on bees	Varroa in the drone brood					Hygienic behaviour, other methods (freeze brood etc.)	No, I treat colonies depending on their individual infestation levels			Approved chemical treatments in Spring/Autumn	Oxalic acid in winter			Removing drone brood				Yes (please specify which method and how often)	often walk away splits, but also demareeing	Partially, breeding from the best queens should be carried out, but the other less productive colonies should not be systematically requeened	5	3	4	4	5	3	5
12205292589	392208789	5	3	national, timber	no	yes	3	3	5			Queens mated in own area					Varroa is not a problem for me (about 5% of colony losses/year due to Varroa)	Once a year (spring or before treatment)	No		Varroa mortality, after treatment		Varroa in the drone brood						Yes				Oxalic acid in winter							Yes (please specify which method and how often)	split	No, selection should not be performed (every colony is allowed to requeen freely).	5	4	4	5	5	3	5
12204114562	392208789	2	2	national	yes	yes	5		5			Queens mated in own area		Queens bought from a pure race breeder (from Ireland)			Varroa is not a problem for me (about 5% of colony losses/year due to Varroa)	Several times a year	Yes				Varroa in the drone brood		Reproduction of Varroa				I never treat for Varroa. (please specify why)	so far. want to avoid intervention that may weaken colony if they're managing okay - eg low/no dwv; also hives are on geopathic stress line (hoping is helping)	I don't treat					Removing drone brood				Yes (please specify which method and how often)	split, as necessary	Partially, breeding from the best queens should be carried out, but the other less productive colonies should not be systematically requeened	2	5	4	5	4	4	4
12203246291	392208789																																									Partially, breeding from the best queens should be carried out, but the other less productive colonies should not be systematically requeened	4	5	5	5	3	4	5
12203013477	392208789	41	1	cdb	no	yes	5	3	5		Queens mated in own apiary						Varroa is not a problem for me (about 5% of colony losses/year due to Varroa)	Never	Yes							varroa in grub cells or on bees			Yes		I don't treat							Frequent nuc creation/requeening		No		No, selection should not be performed (every colony is allowed to requeen freely).	4	5	3	5	3	4	1
12202960063	392208789	7	2	commercial	no	yes	5	5	5	a.m.m is the bee species strongly recommended by my local association (fndba)						original queens supplied by fndba, existing queens are progeny of the original supply.	Varroa is not a problem for me (about 5% of colony losses/year due to Varroa)	Several times a year	No							i just inspect the colony visually, also the removable floor under mesh every time			I never treat for Varroa. (please specify why)	not having seen signs of a problem , i didn’t see the need to treat . i also believe it is short sighted to do so as the colonies may not be disposed to select for hygienic traits	I don't treat								cleanliness, regular brood frame replacement	Yes (please specify which method and how often)	artificial swarm creation when queen cells are present	Partially, breeding from the best queens should be carried out, but the other less productive colonies should not be systematically requeened	3	5	4	5	5	5	5
12202823491	392208789	9	10	national	no	no	4	4	5			Queens mated in own area					There are occasional losses due to Varroa or viruses (10-20%/year)	Several times a year	Yes				Varroa in the drone brood						I never treat for Varroa. (please specify why)	to reduce chemical contamination	I don't treat							Frequent nuc creation/requeening		Yes (please specify which method and how often)	artificial swarm	Yes, selection (breeding only from the best queens) should be performed to have productive and healthy colonies	4	5	5	4	4	3	3
12197946537	392208789	9	25	national	yes	yes	5	1	5				Own queens mated at a particular mating station				Varroa is a problem for me every year, but I have things under control through treatments)	Several times a year	Yes	Varroa mortality, before treatment			Varroa in the drone brood						No, I treat colonies depending on their individual infestation levels			Approved chemical treatments in Spring/Autumn	Oxalic acid in winter			Removing drone brood	Total brood removal if necessary	Frequent nuc creation/requeening		Yes (please specify which method and how often)	splitboard, as needed	Partially, breeding from the best queens should be carried out, but the other less productive colonies should not be systematically requeened	3	4	3	5	3	3	5
12182954473	392208789	1	2	commercial	no	yes	5	5	5			Queens mated in own area					Varroa is not a problem for me (about 5% of colony losses/year due to Varroa)	Never	No							not needed as don’t treat			I never treat for Varroa. (please specify why)	member of fndba and we were advised not to treat	I don't treat									Yes (please specify which method and how often)	only new to beekeeping so did a split from my first hive	Partially, breeding from the best queens should be carried out, but the other less productive colonies should not be systematically requeened	2	4	3	5	4	5	5
12182673444	392208789	6	25	national	no	yes	4	5	4		Queens mated in own apiary						Varroa is not a problem for me (about 5% of colony losses/year due to Varroa)	Never	No		Varroa mortality, after treatment								Yes			Approved chemical treatments in Spring/Autumn	Oxalic acid in winter							Yes (please specify which method and how often)	artificial swarms	Yes, selection (breeding only from the best queens) should be performed to have productive and healthy colonies	4	4	4	4	5	5	3
12174564193	392208789	10	13	national	yes	yes	5	5	5			Queens mated in own area
12174509066	392208789	44	4	timber	yes	yes	5	5	5		Queens mated in own apiary	Queens mated in own area					There are occasional losses due to Varroa or viruses (10-20%/year)	All year long	Yes	Varroa mortality, before treatment	Varroa mortality, after treatment	Varroa on bees	Varroa in the drone brood	Varroa in the worker brood	Reproduction of Varroa			Hygienic behaviour, other methods (freeze brood etc.)	Yes				Oxalic acid in winter							No		Yes, selection (breeding only from the best queens) should be performed to have productive and healthy colonies	5	5	5	5	5	5	5
12171596727	392208789	7	8	langstroth poly hive	yes	yes	5	5	5		Queens mated in own apiary						There are occasional losses due to Varroa or viruses (10-20%/year)	All year long	No		Varroa mortality, after treatment						Hygienic behaviour (pin-test method)		No, I treat colonies depending on their individual infestation levels			Approved chemical treatments in Spring/Autumn								No		No, selection should not be performed (every colony is allowed to requeen freely).	3	4	2	4	3	3	4
12170626654	392208789	5	3	national	yes	yes	5	5	5		Queens mated in own apiary						Varroa is not a problem for me (about 5% of colony losses/year due to Varroa)	Only after treatment	No		Varroa mortality, after treatment								Yes			Approved chemical treatments in Spring/Autumn	Oxalic acid in winter							Yes (please specify which method and how often)	look for queen cells	Yes, selection (breeding only from the best queens) should be performed to have productive and healthy colonies	4	4	3	5	4	4	5
12170559165	392208789	7	20	rose	yes	yes	5	5	5			Queens mated in own area		Queens bought from a pure race breeder (from Ireland)			Varroa is not a problem for me (about 5% of colony losses/year due to Varroa)	Several times a year	No		Varroa mortality, after treatment		Varroa in the drone brood				Hygienic behaviour (pin-test method)		No, I treat colonies depending on their individual infestation levels			Approved chemical treatments in Spring/Autumn				Removing drone brood				No		Yes, selection (breeding only from the best queens) should be performed to have productive and healthy colonies	3	5	4	5	4	5	5
12169727326	392208789	2	6	langstroth	no	i don't know	5	5	5		Queens mated in own apiary						Varroa is a problem for me every year, but I have things under control through treatments)	All year long	Yes	Varroa mortality, before treatment	Varroa mortality, after treatment								Yes										apilife var strips	Yes (please specify which method and how often)	removing swarm cells and making splits.	Partially, breeding from the best queens should be carried out, but the other less productive colonies should not be systematically requeened	3	5	5	5	5	5	5
12169720805	392208789	3	4	national	no	yes	4	1	4			Queens mated in own area			Queens bought from a pure race breeder (from other countries)
12169578852	392208789	50	2	national	no	no				they are not the dark native bees were in our farm over two generationsall died about seven years but a wild swarm came to one of my empty hives i spli it last year and now have two	Queens mated in own apiary		Own queens mated at a particular mating station				Varroa is not a problem for me (about 5% of colony losses/year due to Varroa)	Never	No							i have sometimes but those strips between the foundations not recently														Yes (please specify which method and how often)	i split larger colonis and i keep two brood chambers seperated by a queen excluderand if the lower brood chamber becomes overcrowded or honey bound i take up broodframes above queen excluder and transfer some of the upper ones down
12169191479	392208789	2	5	national	yes	yes	5	5	5		Queens mated in own apiary	Queens mated in own area		Queens bought from a pure race breeder (from Ireland)			Varroa is not a problem for me (about 5% of colony losses/year due to Varroa)	Once a year (spring or before treatment)	Yes		Varroa mortality, after treatment								Yes			Approved chemical treatments in Spring/Autumn								Yes (please specify which method and how often)	artificial swarm	No, selection should not be performed (every colony is allowed to requeen freely).	5	4	3	5	5	3	3
12169139208	392208789	3	5	national	yes	yes	5	5	5					Queens bought from a pure race breeder (from Ireland)			Varroa is not a problem for me (about 5% of colony losses/year due to Varroa)	Several times a year	Yes	Varroa mortality, before treatment	Varroa mortality, after treatment		Varroa in the drone brood	Varroa in the worker brood				Hygienic behaviour, other methods (freeze brood etc.)	Yes			Approved chemical treatments in Spring/Autumn	Oxalic acid in winter							Yes (please specify which method and how often)	pagden method	Yes, selection (breeding only from the best queens) should be performed to have productive and healthy colonies	5	5	5	5	5	5	5
12169123463	392208789	10	6	commercial	no	yes	4	3	5					Queens bought from a pure race breeder (from Ireland)			Varroa is not a problem for me (about 5% of colony losses/year due to Varroa)	Never	No							i don’t really do inspections unless i see a problem			Yes				Oxalic acid in winter							Yes (please specify which method and how often)	a bit irregularly by equalising hives and the occasional split	Yes, selection (breeding only from the best queens) should be performed to have productive and healthy colonies	3	5	4	4	5	4	4
12169096667	392208789	3	15	national and commercial	no	yes	5	5	5		Queens mated in own apiary			Queens bought from a pure race breeder (from Ireland)			Varroa is a problem for me every year, but I have things under control through treatments)	Once a year (spring or before treatment)	No		Varroa mortality, after treatment						Hygienic behaviour (pin-test method)		No, I treat colonies depending on their individual infestation levels			Approved chemical treatments in Spring/Autumn	Oxalic acid in winter							Yes (please specify which method and how often)	stripping nucs of crowded colony’s/artificial swarm	Yes, selection (breeding only from the best queens) should be performed to have productive and healthy colonies	5	5	5	5	5	5	5
12167984576	392208789	40	5	wbc; rose; long hives (using commercial frames and an einraumbeute (german) hive) ; cdb	yes	yes	5	5	5		Queens mated in own apiary			Queens bought from a pure race breeder (from Ireland)			Varroa is not a problem for me (about 5% of colony losses/year due to Varroa)	Never	No										I never treat for Varroa. (please specify why)	i take a dawinian approach and have concluded that treatments etc. only delay the adaptability of the bees to the varroa. i am relaxed about swarming and will do splits occasionally - partly with an eye on creating a brood break.	I don't treat									Yes (please specify which method and how often)	splits; occasionally; i don't get worried about swarming as it is not a social problem in the rural area where i have my bees.	Partially, breeding from the best queens should be carried out, but the other less productive colonies should not be systematically requeened	3	4	2	4	4	4	4
12166132331	392208789	12	22	national	no	yes	5	5	5		Queens mated in own apiary	Queens mated in own area					There are occasional losses due to Varroa or viruses (10-20%/year)	All year long	Yes	Varroa mortality, before treatment	Varroa mortality, after treatment		Varroa in the drone brood	Varroa in the worker brood					No, I treat colonies depending on their individual infestation levels			Approved chemical treatments in Spring/Autumn	Oxalic acid in winter			Removing drone brood		Frequent nuc creation/requeening		Yes (please specify which method and how often)	splits, queens removed, bloodless periods june july, bailey frame change,	Partially, breeding from the best queens should be carried out, but the other less productive colonies should not be systematically requeened	4	4	3	5	4	5	3
12165973605	392208789	8	8	commercial	yes	yes	5	5	5		Queens mated in own apiary	Queens mated in own area					There are occasional losses due to Varroa or viruses (10-20%/year)	Once a year (spring or before treatment)	Yes	Varroa mortality, before treatment	Varroa mortality, after treatment								No, I treat colonies depending on their individual infestation levels			Approved chemical treatments in Spring/Autumn								Yes (please specify which method and how often)	split and make a nuc with old queen	Partially, breeding from the best queens should be carried out, but the other less productive colonies should not be systematically requeened	5	3	3	3	3	4	1
12165765892	392208789	2	3	layens agus topbar	no	yes	5	5	5			Queens mated in own area					Varroa is not a problem for me (about 5% of colony losses/year due to Varroa)	Never	No					Varroa in the worker brood					Yes				Oxalic acid in winter							No		No, selection should not be performed (every colony is allowed to requeen freely).	3	3	5	5	5	3	5
12164847494	392208789	29	100	rose hive	yes	yes	5	5	5		Queens mated in own apiary						Varroa is not a problem for me (about 5% of colony losses/year due to Varroa)	Never	No							i gave up checking 4years ago i haven’t treated sense then and see no problems with mites			I never treat for Varroa. (please specify why)	no for last 4seasons	I don't treat									Yes (please specify which method and how often)	tilt method seven to ten days depending on weather flow etc.	Yes, selection (breeding only from the best queens) should be performed to have productive and healthy colonies	5	5	4	5	5	3	5
12164348847	392208789	6	18	national	yes	yes	5		5		Queens mated in own apiary						Varroa is not a problem for me (about 5% of colony losses/year due to Varroa)	Several times a year	No	Varroa mortality, before treatment	Varroa mortality, after treatment			Varroa in the worker brood					Yes			Approved chemical treatments in Spring/Autumn	Oxalic acid in winter		Oxalic acid combined with brood interruption (nuc creation)					Yes (please specify which method and how often)	removal of queen from the hive to nuc	Partially, breeding from the best queens should be carried out, but the other less productive colonies should not be systematically requeened	5	5	5	5	5	5	5
12164146904	392208789	40	170	national	yes	yes	5	4	5	great honey producers under irish conditions	Queens mated in own apiary	Queens mated in own area	Own queens mated at a particular mating station				There are occasional losses due to Varroa or viruses (10-20%/year)	Several times a year	Yes	Varroa mortality, before treatment	Varroa mortality, after treatment	Varroa on bees							No, I treat colonies depending on their individual infestation levels										apiguard in autumn	Yes (please specify which method and how often)	nucleus method, depending on presence of swarm cells	Partially, breeding from the best queens should be carried out, but the other less productive colonies should not be systematically requeened	4	5	4	4	4	2	5
12163508083	392208789	10	6	national	yes	yes	5	3	5		Queens mated in own apiary						Varroa is a problem for me every year, but I have things under control through treatments)	All year long	Yes	Varroa mortality, before treatment	Varroa mortality, after treatment	Varroa on bees	Varroa in the drone brood						Yes			Approved chemical treatments in Spring/Autumn	Oxalic acid in winter							Yes (please specify which method and how often)	padgen method	Yes, selection (breeding only from the best queens) should be performed to have productive and healthy colonies	4	5	3	5	5	5	3
12163500279	392208789	4	6	national	yes	yes	5	5	5		Queens mated in own apiary						Varroa is not a problem for me (about 5% of colony losses/year due to Varroa)	Several times a year	Yes	Varroa mortality, before treatment		Varroa on bees							Yes			Approved chemical treatments in Spring/Autumn								Yes (please specify which method and how often)	remove queen to nuc if there are swarm cells	Partially, breeding from the best queens should be carried out, but the other less productive colonies should not be systematically requeened	5	5	3	5	4	4	5
12163233106	392208789	1	2	national	yes	yes	5	5	5			Queens mated in own area						Several times a year	No	Varroa mortality, before treatment	Varroa mortality, after treatment								Yes			Approved chemical treatments in Spring/Autumn								Yes (please specify which method and how often)	artificial	Yes, selection (breeding only from the best queens) should be performed to have productive and healthy colonies	1	3	3	5	5	4	5
12163223266	392208789	10	10	national mainly but one cdb	yes	yes	5	4	4		Queens mated in own apiary			Queens bought from a pure race breeder (from Ireland)			There are occasional losses due to Varroa or viruses (10-20%/year)	Several times a year	Yes				Varroa in the drone brood						No, I treat colonies depending on their individual infestation levels			Approved chemical treatments in Spring/Autumn	Oxalic acid in winter							Yes (please specify which method and how often)	pagden and taking old q to nuc	Yes, selection (breeding only from the best queens) should be performed to have productive and healthy colonies							5
12162510638	392208789	6	23	national timber	yes	yes	5	5	5		Queens mated in own apiary	Queens mated in own area		Queens bought from a pure race breeder (from Ireland)			There are occasional losses due to Varroa or viruses (10-20%/year)	Several times a year	Yes							dont treat just do regular mite drop counts			I never treat for Varroa. (please specify why)	a couple of years ago my colonies were swams from known wild colonies who survived without treatment so i felt i should not interfere	I don't treat									Yes (please specify which method and how often)	artificial swarm	Yes, selection (breeding only from the best queens) should be performed to have productive and healthy colonies	5	5	4	5	5	5	5
12160570437	392208789	1	2	national and a polystyene nuc	no	yes	5	5	5		Queens mated in own apiary					a gift from an association member when i lost my original queen		Several times a year	No							only checked the floor			I never treat for Varroa. (please specify why)	i only started this year an didn't treat either hive or nuc	I don't treat									Yes (please specify which method and how often)	removal of queen cells	Partially, breeding from the best queens should be carried out, but the other less productive colonies should not be systematically requeened	1	3	3	5	4	4	3
12160092278	392208789	20	50	national	yes	yes	5		5		Queens mated in own apiary	Queens mated in own area		Queens bought from a pure race breeder (from Ireland)			There are occasional losses due to Varroa or viruses (10-20%/year)	Several times a year	No				Varroa in the drone brood	Varroa in the worker brood					Yes			Approved chemical treatments in Spring/Autumn			Oxalic acid combined with brood interruption (nuc creation)					Yes (please specify which method and how often)	swarm prevention measures. if those don't work and the bees continue swarm preparation - artificial swarm when queen cells are charged.	Partially, breeding from the best queens should be carried out, but the other less productive colonies should not be systematically requeened	1	5	4	4	3	3	5
12159953783	392208789	2	3	commercial	no	yes	5	5	5	i believe that being native they are less impacted by its native climate and thus has increased chances of overwintering survival, they are naturally frugal		Queens mated in own area		Queens bought from a pure race breeder (from Ireland)			Varroa is a problem for me every year, but I have things under control through treatments)	Several times a year	Yes				Varroa in the drone brood	Varroa in the worker brood		varroa drop on examination board but am planning on abandoning this practice			Yes			Approved chemical treatments in Spring/Autumn								Yes (please specify which method and how often)	some swarm control removal of queen eggs weekly during swarm season and produce artificial swarms
12154320126	392208789	8	11	national	no	yes	5	5	5		Queens mated in own apiary						Varroa is a problem for me every year, but I have things under control through treatments)	Several times a year	Yes			Varroa on bees	Varroa in the drone brood	Varroa in the worker brood					No, I treat colonies depending on their individual infestation levels			Approved chemical treatments in Spring/Autumn						Frequent nuc creation/requeening		Yes (please specify which method and how often)	artificial swarm	No, selection should not be performed (every colony is allowed to requeen freely).	3	5	4	5	5	5	4
12152034025	392208789	10	14	national	no	yes	5	1	4			Queens mated in own area					There are occasional losses due to Varroa or viruses (10-20%/year)	Several times a year	No		Varroa mortality, after treatment	Varroa on bees	Varroa in the drone brood						Yes			Approved chemical treatments in Spring/Autumn					Total brood removal if necessary			Yes (please specify which method and how often)	removal of queen/remove queen cells/makeup nucs	Yes, selection (breeding only from the best queens) should be performed to have productive and healthy colonies	4	4	3	5	5	4	4
12150532050	392208789	3	2	national hive	no	no	5	3	5			Queens mated in own area					Varroa is not a problem for me (about 5% of colony losses/year due to Varroa)	Several times a year	Yes	Varroa mortality, before treatment	Varroa mortality, after treatment	Varroa on bees	Varroa in the drone brood						Yes			Approved chemical treatments in Spring/Autumn	Oxalic acid in winter							Yes (please specify which method and how often)	break down queen cells any time i see them	Yes, selection (breeding only from the best queens) should be performed to have productive and healthy colonies	4	5	5	5	4	3	2
12149021767	392208789	3	1	poly national hive	no	yes	5	5	5							q was mated in fermanagh	Varroa is a problem for me every year, but I have things under control through treatments)	Once a year (spring or before treatment)	Yes	Varroa mortality, before treatment	Varroa mortality, after treatment								Yes										i used apiguard for first 2 years but nothing in 2020.	Yes (please specify which method and how often)	q is clipped & check for q cells	Partially, breeding from the best queens should be carried out, but the other less productive colonies should not be systematically requeened	3	4	3	5	5	4	5
12148439570	392208789	6	15	national	yes	yes	5	4	3			Queens mated in own area					Varroa is a problem for me every year, but I have things under control through treatments)	Several times a year	Yes	Varroa mortality, before treatment	Varroa mortality, after treatment								Yes			Approved chemical treatments in Spring/Autumn	Oxalic acid in winter							Yes (please specify which method and how often)	queen removal	Yes, selection (breeding only from the best queens) should be performed to have productive and healthy colonies	5	4	4	5	3	4	4
12146998867	392208789	15	55	commerical	yes	yes	5	5	5	i find the native amm black bee very productivy, docile and has many other good traits such as hygienic behaviour, comb building, & over wintering	Queens mated in own apiary	Queens mated in own area	Own queens mated at a particular mating station	Queens bought from a pure race breeder (from Ireland)		note i have bought native queens from galtee bees and colemore bees both native amm breeders	Varroa is not a problem for me (about 5% of colony losses/year due to Varroa)	All year long	Yes	Varroa mortality, before treatment	Varroa mortality, after treatment		Varroa in the drone brood		Reproduction of Varroa	check for dwv, visual signs of varroa on bees			Yes			Approved chemical treatments in Spring/Autumn				Removing drone brood		Frequent nuc creation/requeening		Yes (please specify which method and how often)	7 day inpections where possible, artifical splits, requeening from grafting	Partially, breeding from the best queens should be carried out, but the other less productive colonies should not be systematically requeened	5	5	5	5	5	5	5
12141645516	392208789	6	5	national	no	yes	5	5	5	i believe as it is the most widespread and most kept bee in ireland it is the best choice of bee. keeping only black bees ensures that we have minimal hybridisation within our locales and thus prevents aggressive behaviour (and other negative traits) within our bees		Queens mated in own area				i bought my current set of hives from a beekeeper within 40kms from me . they are very mixed with orange bands, some with a russet colour across their whole bodies. they are not always aggressive but are very temperamental as they are a lot more aggressive than other bees i've worked with around the year.	Varroa is a problem for me every year, but I have things under control through treatments)	Never	Yes	Varroa mortality, before treatment	Varroa mortality, after treatment								Yes			Approved chemical treatments in Spring/Autumn							apiguard as directed in the autumn . i plan on utilising oxalic acid sublimation in the winter also.	Yes (please specify which method and how often)	in may . split some hives to increase numbers and as swarm control .	Yes, selection (breeding only from the best queens) should be performed to have productive and healthy colonies	4	5	5	5	5	5	5
12139021627	392208789	50	90	commercial	yes	yes	5	5	5		Queens mated in own apiary	Queens mated in own area					There are occasional losses due to Varroa or viruses (10-20%/year)	Several times a year	Yes		Varroa mortality, after treatment		Varroa in the drone brood						Yes			Approved chemical treatments in Spring/Autumn	Oxalic acid in winter							Yes (please specify which method and how often)	clipped and marked queen with inspections	Yes, selection (breeding only from the best queens) should be performed to have productive and healthy colonies	5	5	5	4		4
12138888621	392208789	10	28	commercial	no	yes	3	5	3		Queens mated in own apiary			Queens bought from a pure race breeder (from Ireland)			Varroa is not a problem for me (about 5% of colony losses/year due to Varroa)	Never	Yes				Varroa in the drone brood			deformed wing			Yes				Oxalic acid in winter							Yes (please specify which method and how often)	nuc creation	Partially, breeding from the best queens should be carried out, but the other less productive colonies should not be systematically requeened	4	3	4	5	2	3	1
12138886682	392208789	20	6	national and/or commercial	yes	yes	5	5	5		Queens mated in own apiary						Varroa is not a problem for me (about 5% of colony losses/year due to Varroa)	Several times a year	Yes			Varroa on bees	Varroa in the drone brood			started to look at % of groomed varroa on inserts			Yes		I don't treat					Removing drone brood			queen caging	Yes (please specify which method and how often)	nuc creation and artificial swarms	Partially, breeding from the best queens should be carried out, but the other less productive colonies should not be systematically requeened	2	4	4	5	4	4	5
12138882199	392208789	2	3	national	no	yes				i use a bait hive and thats what i trap!						queen comes with baited hive	Varroa is not a problem for me (about 5% of colony losses/year due to Varroa)	Never	Yes							i am just a starter and not sure if i can identify varroa		Hygienic behaviour, other methods (freeze brood etc.)	Yes										bannana skin and rhubarb leaf and crushed stalk!	No		No, selection should not be performed (every colony is allowed to requeen freely).			4
12138878990	392208789	3	6	jumbo	no	yes	5	5	5			Queens mated in own area					Varroa is not a problem for me (about 5% of colony losses/year due to Varroa)	All year long	Yes		Varroa mortality, after treatment		Varroa in the drone brood	Varroa in the worker brood					Yes				Oxalic acid in winter							Yes (please specify which method and how often)	artifical swarm	Partially, breeding from the best queens should be carried out, but the other less productive colonies should not be systematically requeened	3	3	3	4	3	3	4
12138875644	392208789	1	2	national	yes	yes	5	1	5					Queens bought from a pure race breeder (from Ireland)			Varroa is not a problem for me (about 5% of colony losses/year due to Varroa)	All year long	Yes	Varroa mortality, before treatment	Varroa mortality, after treatment	Varroa on bees		Varroa in the worker brood					No, I treat colonies depending on their individual infestation levels			Approved chemical treatments in Spring/Autumn								Yes (please specify which method and how often)	removing a nucleas	No, selection should not be performed (every colony is allowed to requeen freely).	3	3	3	5	3	3	5
12138871580	392208789	1	9	national timber hive & bs honeybees national poly nuc	yes	yes	5	5	5		Queens mated in own apiary	Queens mated in own area		Queens bought from a pure race breeder (from Ireland)			There are occasional losses due to Varroa or viruses (10-20%/year)	Several times a year	Yes	Varroa mortality, before treatment	Varroa mortality, after treatment	Varroa on bees					Hygienic behaviour (pin-test method)		Yes			Approved chemical treatments in Spring/Autumn	Oxalic acid in winter							Yes (please specify which method and how often)	artificial splits	Yes, selection (breeding only from the best queens) should be performed to have productive and healthy colonies	5	5	5	5	5	4	5
12138715939	392208789	2	13	national	yes	yes	5	1	5		Queens mated in own apiary			Queens bought from a pure race breeder (from Ireland)		swarm capture	There are occasional losses due to Varroa or viruses (10-20%/year)	Once a year (spring or before treatment)	Yes	Varroa mortality, before treatment	Varroa mortality, after treatment	Varroa on bees							Yes			Approved chemical treatments in Spring/Autumn	Oxalic acid in winter							Yes (please specify which method and how often)	artificial swarm	Yes, selection (breeding only from the best queens) should be performed to have productive and healthy colonies	4	4	4	5	2	4	4
12113169410	392208789	2	2	national	yes	yes	5	4	5			Queens mated in own area					Varroa is not a problem for me (about 5% of colony losses/year due to Varroa)	Several times a year	Yes				Varroa in the drone brood	Varroa in the worker brood		review of the tray at the bottom of the hive			Yes			Approved chemical treatments in Spring/Autumn								No		Yes, selection (breeding only from the best queens) should be performed to have productive and healthy colonies	4	5	4	5	5	5	3
12104844755	392208789	8	5	national	no	yes	4	3	5		Queens mated in own apiary			Queens bought from a pure race breeder (from Ireland)			Varroa is not a problem for me (about 5% of colony losses/year due to Varroa)	Once a year (spring or before treatment)	No		Varroa mortality, after treatment						Hygienic behaviour (pin-test method)		Yes			Approved chemical treatments in Spring/Autumn								Yes (please specify which method and how often)	move old queen and bees when queen cells appear	Yes, selection (breeding only from the best queens) should be performed to have productive and healthy colonies	5	5	5	5	5	5	5
12103155193	392208789	6	20	bs single national hive	no	yes	5	5	5		Queens mated in own apiary	Queens mated in own area	Own queens mated at a particular mating station				Varroa is a problem for me every year, but I have things under control through treatments)	All year long	Yes	Varroa mortality, before treatment	Varroa mortality, after treatment								No, I treat colonies depending on their individual infestation levels			Approved chemical treatments in Spring/Autumn						Frequent nuc creation/requeening		Yes (please specify which method and how often)	nuc creation in spring. queen cell harvesting as presented from chosen stock.	Partially, breeding from the best queens should be carried out, but the other less productive colonies should not be systematically requeened	5	5	5	5	2	3	2
12097525120	392208789	25	24	national	yes	yes	5	2	5		Queens mated in own apiary			Queens bought from a pure race breeder (from Ireland)			There are occasional losses due to Varroa or viruses (10-20%/year)	All year long	Yes			Varroa on bees	Varroa in the drone brood	Varroa in the worker brood		general health, chalk brood is very evident some times.			Yes										in august i use oxalic acid and glysering soaked in blue towels when varroa is evident.	Yes (please specify which method and how often)	nine day inspections and splitting hives if queen cells are raised.	Yes, selection (breeding only from the best queens) should be performed to have productive and healthy colonies	2	5	5	5	5	5	5
12091914623	392208789	4	4	national	yes	yes	2	2	5		Queens mated in own apiary	Queens mated in own area		Queens bought from a pure race breeder (from Ireland)			Varroa is not a problem for me (about 5% of colony losses/year due to Varroa)	Only after treatment	No		Varroa mortality, after treatment		Varroa in the drone brood						Yes										apiguard in august, oxalic in december	Yes (please specify which method and how often)	artificial swarm and brood weakening (making nucs)	Yes, selection (breeding only from the best queens) should be performed to have productive and healthy colonies	3	5	4	5	3	4	5
12090124866	392208789	10	8	wbp	yes	yes	5	5	5			Queens mated in own area					Varroa is a problem for me every year, but I have things under control through treatments)	Several times a year	No							mite drop			No, I treat colonies depending on their individual infestation levels				Oxalic acid in winter							Yes (please specify which method and how often)	artificial swarm	Partially, breeding from the best queens should be carried out, but the other less productive colonies should not be systematically requeened	3	3		5	4	4	5
12088523633	392208789	2	9	poly national with underfloor entrances	yes	yes	5	5	5			Queens mated in own area		Queens bought from a pure race breeder (from Ireland)			Varroa is not a problem for me (about 5% of colony losses/year due to Varroa)	All year long	No	Varroa mortality, before treatment	Varroa mortality, after treatment					pull bottom inspection board on almost every visit			No, I treat colonies depending on their individual infestation levels										apply apiguard in sep 2 applications 14 days apart	No		Yes, selection (breeding only from the best queens) should be performed to have productive and healthy colonies	3	5	4	5	5	5	4
12088243833	392208789	6	5	national	yes	yes	5	4	5		Queens mated in own apiary						Varroa is not a problem for me (about 5% of colony losses/year due to Varroa)	Several times a year	No	Varroa mortality, before treatment	Varroa mortality, after treatment								No, I treat colonies depending on their individual infestation levels			Approved chemical treatments in Spring/Autumn								Yes (please specify which method and how often)	artificial swarm method	No, selection should not be performed (every colony is allowed to requeen freely).	2	5	4	5	4	4	5
12087960701	392208789	4	8	insulated warre	yes	yes	3	1	5			Queens mated in own area		Queens bought from a pure race breeder (from Ireland)			Varroa is not a problem for me (about 5% of colony losses/year due to Varroa)	Once a year (spring or before treatment)	No							varroa on base board			I never treat for Varroa. (please specify why)	trying to establish resistance/tolerance	I don't treat									No		Partially, breeding from the best queens should be carried out, but the other less productive colonies should not be systematically requeened	1	2	1	4	5	1	2
12087560688	392208789	10	7	commercial	yes	yes	5	5	5		Queens mated in own apiary						There are occasional losses due to Varroa or viruses (10-20%/year)	All year long	Yes			Varroa on bees						Hygienic behaviour, other methods (freeze brood etc.)	Yes		I don't treat									Yes (please specify which method and how often)	split hives	Yes, selection (breeding only from the best queens) should be performed to have productive and healthy colonies	4	3	5	5	5	4	5
12087463790	392208789	43	620	langstrot		yes	4	1	5	i got 6 queens dark bee 2 years ago i am brreeding					Queens bought from a pure race breeder (from other countries)		There are occasional losses due to Varroa or viruses (10-20%/year)	Several times a year	Yes							the development of the bee colonie			Yes			Approved chemical treatments in Spring/Autumn								Yes (please specify which method and how often)	i make nuc or split	Partially, breeding from the best queens should be carried out, but the other less productive colonies should not be systematically requeened	4	4	4	4	4	4	4
12087183239	392208789	15	7	national	yes	yes	5	5	5	it is the honey that has evolved to live in this environment and is best suited to be the honey bee in ireland, irrespective of what some beekeepers believe, thinking they know best, importing different strains/ races. its genetics need to be protected from hybridization with foreign imported non local bees.	Queens mated in own apiary	Queens mated in own area					Varroa is not a problem for me (about 5% of colony losses/year due to Varroa)	Several times a year	No			Varroa on bees	Varroa in the drone brood			mite drop on inserts. i will begin monitoring for grooming levels in my colonies this winter.			No, I treat colonies depending on their individual infestation levels		I don't treat					Removing drone brood		Frequent nuc creation/requeening		Yes (please specify which method and how often)	artificial swarm control	Yes, selection (breeding only from the best queens) should be performed to have productive and healthy colonies	2	3	4	5	5	4	5
12087152529	392208789	40	40	mainly commercial	yes	i don't know	4	4	4		Queens mated in own apiary						There are occasional losses due to Varroa or viruses (10-20%/year)	Once a year (spring or before treatment)	No		Varroa mortality, after treatment								Yes			Approved chemical treatments in Spring/Autumn								Yes (please specify which method and how often)	i don’t know the name	No, selection should not be performed (every colony is allowed to requeen freely).	5	4	4	4	4	4	3
12087118419	392208789	2	10	commerical	yes	yes	5	5	5		Queens mated in own apiary						Varroa is not a problem for me (about 5% of colony losses/year due to Varroa)	All year long	Yes	Varroa mortality, before treatment	Varroa mortality, after treatment		Varroa in the drone brood		Reproduction of Varroa			Hygienic behaviour, other methods (freeze brood etc.)	Yes			Approved chemical treatments in Spring/Autumn								Yes (please specify which method and how often)	clip the queen and adding supers	Yes, selection (breeding only from the best queens) should be performed to have productive and healthy colonies	5	5	5	5	5	5	5
12087072042	392208789	5	6	national	yes	yes	4	4	4		Queens mated in own apiary	Queens mated in own area					Varroa is not a problem for me (about 5% of colony losses/year due to Varroa)	Several times a year	No	Varroa mortality, before treatment	Varroa mortality, after treatment	Varroa on bees	Varroa in the drone brood						No, I treat colonies depending on their individual infestation levels			Approved chemical treatments in Spring/Autumn	Oxalic acid in winter							Yes (please specify which method and how often)	nucleus method when i see queen cells	Yes, selection (breeding only from the best queens) should be performed to have productive and healthy colonies	3	4	4	5	5	4	1
12087068735	392208789	6	23	national timber	yes	yes	5	5	5	because they are docile and easy to work with		Queens mated in own area					Varroa is not a problem for me (about 5% of colony losses/year due to Varroa)	Several times a year	No							mite drop on varroa floor insert			I never treat for Varroa. (please specify why)	a good deal of my colonies came from knows wild sources where they survived with out treatment so i decided to go treatment free allow them to build up tolerance	I don't treat									Yes (please specify which method and how often)	artificial swarm	Yes, selection (breeding only from the best queens) should be performed to have productive and healthy colonies	5	5	5	5	5	5	5
12087065027	392208789	10	6	national	yes	yes	4	1	5							my own q’s plus from j getty	Varroa is not a problem for me (about 5% of colony losses/year due to Varroa)	Never	No										Yes				Oxalic acid in winter							Yes (please specify which method and how often)	artificial swarm	Partially, breeding from the best queens should be carried out, but the other less productive colonies should not be systematically requeened	3	2	2	5	4	2	5
12085554453	392208789	6	30	national	yes	yes	5	2	4			Queens mated in own area				all swarms originally from wild colonies in midlands	There are occasional losses due to Varroa or viruses (10-20%/year)	Several times a year	No				Varroa in the drone brood						I never treat for Varroa. (please specify why)	genetic resistance is better						Removing drone brood			artemisia arbrotanum in autumn .icing sugar in summer	No		Partially, breeding from the best queens should be carried out, but the other less productive colonies should not be systematically requeened	4	2	4	5	3	1	4
12082633748	392208789	12	22	national	yes	yes	5	3	5		Queens mated in own apiary			Queens bought from a pure race breeder (from Ireland)			There are occasional losses due to Varroa or viruses (10-20%/year)	Several times a year	Yes	Varroa mortality, before treatment		Varroa on bees	Varroa in the drone brood	Varroa in the worker brood			Hygienic behaviour (pin-test method)		Yes			Approved chemical treatments in Spring/Autumn				Removing drone brood	Total brood removal if necessary			Yes (please specify which method and how often)	pagden, snelgrove	Yes, selection (breeding only from the best queens) should be performed to have productive and healthy colonies	4	5	3	4	3	4	4
12073131483	392208789	5	4	national	yes	yes	5	4	5		Queens mated in own apiary	Queens mated in own area					Varroa is a problem for me every year, but I have things under control through treatments)	Several times a year	Yes	Varroa mortality, before treatment	Varroa mortality, after treatment		Varroa in the drone brood						Yes			Approved chemical treatments in Spring/Autumn	Oxalic acid in winter							Yes (please specify which method and how often)	queen removed into a nuc	Yes, selection (breeding only from the best queens) should be performed to have productive and healthy colonies	3	5	3	5	5	5	4
12073051230	392208789	50	2	cdb	no	i don't know				i left empty hives and got 2 swarms 2 yrs ago they have suvivied so far as i do nothing for them except too 15 lbs honey june fed them a bit of syrup. but what maybe of intetest is i have bees in my roof for as long as i can remeber						just arrived in empty hives	Varroa is not a problem for me (about 5% of colony losses/year due to Varroa)	Never	No							never look at them wouldnt have a clue			I never treat for Varroa. (please specify why)	a friend said he would call and do something	I don't treat								maybe a friend might didnt do anything last year	No		No, selection should not be performed (every colony is allowed to requeen freely).	2	5
12066881475	392208789	16	20	national	no	yes	5	5	5			Queens mated in own area					Varroa is not a problem for me (about 5% of colony losses/year due to Varroa)	Several times a year	No			Varroa on bees	Varroa in the drone brood						Yes				Oxalic acid in winter			Removing drone brood			apiguard is autumn	Yes (please specify which method and how often)	make up nucs with swarm cells	Partially, breeding from the best queens should be carried out, but the other less productive colonies should not be systematically requeened	4	2	3	4	4	3	3
12063141980	392208789	10	10	commercial	no	yes	5		5		Queens mated in own apiary						There are occasional losses due to Varroa or viruses (10-20%/year)	Several times a year	No				Varroa in the drone brood						Yes			Approved chemical treatments in Spring/Autumn								Yes (please specify which method and how often)	padgen method	Yes, selection (breeding only from the best queens) should be performed to have productive and healthy colonies	4	5	5	5	4	4	5
12062913682	392208789	6	4	national	no	yes		1	5			Queens mated in own area					Varroa is not a problem for me (about 5% of colony losses/year due to Varroa)	Several times a year	Yes		Varroa mortality, after treatment								Yes											Yes (please specify which method and how often)	artificial swarm	Yes, selection (breeding only from the best queens) should be performed to have productive and healthy colonies	5	5	5	4	1	4	1
12060185867	392208789	3	3	warre	yes	yes	5	5	5			Queens mated in own area					There are occasional losses due to Varroa or viruses (10-20%/year)	All year long	Yes							varroa count through floor mesh			No, I treat colonies depending on their individual infestation levels		I don't treat									Yes (please specify which method and how often)	split in spring in a strong colony only
12058351365	392208789	4	10	national & one top bar hive	yes	yes	5	5	5			Queens mated in own area				swarms	There are occasional losses due to Varroa or viruses (10-20%/year)	Never	No							i haven’t treated for 3/4 years now			I never treat for Varroa. (please specify why)	dividing colonies seems to help with no brood cells for while breaks the cycle of varroa	I don't treat					Removing drone brood		Frequent nuc creation/requeening	sometimes by removing drone brood	Yes (please specify which method and how often)	by making splits	No, selection should not be performed (every colony is allowed to requeen freely).	3	5	3	5	3	4	4
12052699752	392208789	6	50	loghive	no	yes	5	5	5			Queens mated in own area					Varroa is not a problem for me (about 5% of colony losses/year due to Varroa)	Never	No							don't inspect for varroa			Yes		I don't treat									No		No, selection should not be performed (every colony is allowed to requeen freely).	1	5	1	5	5	1	5
12049043255	392208789	11	7	national	yes	yes	5	4	5		Queens mated in own apiary						Varroa is not a problem for me (about 5% of colony losses/year due to Varroa)	Once a year (spring or before treatment)	No				Varroa in the drone brood	Varroa in the worker brood			Hygienic behaviour (pin-test method)		Yes			Approved chemical treatments in Spring/Autumn								No		Yes, selection (breeding only from the best queens) should be performed to have productive and healthy colonies	4	5	5	5	5	5	5
12048184988	392208789	10	18	national	yes	yes	3	3	3			Queens mated in own area
12046778337	392208789	8	40	national lyson polystyrene	yes	yes	3		5		Queens mated in own apiary					i have mated queens in dublin-meath-kilkenny	Varroa is not a problem for me (about 5% of colony losses/year due to Varroa)	Once a year (spring or before treatment)	No	Varroa mortality, before treatment	Varroa mortality, after treatment	Varroa on bees							Yes				Oxalic acid in winter							Yes (please specify which method and how often)	i split in spring and monitor the colonies in case another split is requirerd	No, selection should not be performed (every colony is allowed to requeen freely).	3		2	5	4	3	2
12045065841	392208789	2	2	national	no	yes	4	4	5					Queens bought from a pure race breeder (from Ireland)			Varroa is a problem for me every year, but I have things under control through treatments)	Several times a year	No	Varroa mortality, before treatment	Varroa mortality, after treatment								Yes			Approved chemical treatments in Spring/Autumn	Oxalic acid in winter							Yes (please specify which method and how often)	weekly inspections	Partially, breeding from the best queens should be carried out, but the other less productive colonies should not be systematically requeened	4	4	4	5	5	4	4
12045055664	392208789	4	3	national	no	yes	5	5	5		Queens mated in own apiary						Varroa is not a problem for me (about 5% of colony losses/year due to Varroa)	Several times a year	No	Varroa mortality, before treatment	Varroa mortality, after treatment				Reproduction of Varroa		Hygienic behaviour (pin-test method)		Yes			Approved chemical treatments in Spring/Autumn								No		Yes, selection (breeding only from the best queens) should be performed to have productive and healthy colonies	5	5	5	5	5	4	3
12045042518	392208789	8	49	national	no	yes	3		4					Queens bought from a pure race breeder (from Ireland)			Varroa is not a problem for me (about 5% of colony losses/year due to Varroa)	Several times a year	Yes				Varroa in the drone brood	Varroa in the worker brood			Hygienic behaviour (pin-test method)		Yes			Approved chemical treatments in Spring/Autumn	Oxalic acid in winter							Yes (please specify which method and how often)	german method	Yes, selection (breeding only from the best queens) should be performed to have productive and healthy colonies	4	4	4	4	4	4	3
12044990993	392208789	20	12	com. and nat. in 2 apiaries	yes	yes	5	5	5			Queens mated in own area					There are occasional losses due to Varroa or viruses (10-20%/year)	Several times a year	Yes	Varroa mortality, before treatment	Varroa mortality, after treatment	Varroa on bees	Varroa in the drone brood						No, I treat colonies depending on their individual infestation levels						Oxalic acid combined with brood interruption (nuc creation)	Removing drone brood				Yes (please specify which method and how often)	place queen in nuc each time i see q. cells	Partially, breeding from the best queens should be carried out, but the other less productive colonies should not be systematically requeened	3	4	4	5	4	4	4
12044217485	392208789	3	8	national	yes	yes	5	5	5		Queens mated in own apiary						Varroa is not a problem for me (about 5% of colony losses/year due to Varroa)	All year long	Yes		Varroa mortality, after treatment		Varroa in the drone brood						No, I treat colonies depending on their individual infestation levels			Approved chemical treatments in Spring/Autumn								Yes (please specify which method and how often)	regular inspections	No, selection should not be performed (every colony is allowed to requeen freely).	3	5	5	5	5	4	5
12043710292	392208789	6	18	mix of national/commercial and a mix of polystyrene/ wooden	yes	yes	5	3	5		Queens mated in own apiary			Queens bought from a pure race breeder (from Ireland)			Varroa is not a problem for me (about 5% of colony losses/year due to Varroa)	Never	No				Varroa in the drone brood	Varroa in the worker brood					Yes		I don't treat									No		Yes, selection (breeding only from the best queens) should be performed to have productive and healthy colonies	3	5	3	5	4	4	5
12042593771	392208789	2	6	national	no	yes	1	5	5			Queens mated in own area					Varroa is not a problem for me (about 5% of colony losses/year due to Varroa)	Several times a year	Yes	Varroa mortality, before treatment	Varroa mortality, after treatment	Varroa on bees	Varroa in the drone brood	Varroa in the worker brood	Reproduction of Varroa			Hygienic behaviour, other methods (freeze brood etc.)	Yes		I don't treat									No		Yes, selection (breeding only from the best queens) should be performed to have productive and healthy colonies	2	3	4	5	5	4	5
12042553778	392208789				no	yes	1	5	5			Queens mated in own area					Varroa is not a problem for me (about 5% of colony losses/year due to Varroa)	Several times a year	No	Varroa mortality, before treatment	Varroa mortality, after treatment	Varroa on bees	Varroa in the drone brood	Varroa in the worker brood	Reproduction of Varroa				Yes		I don't treat							Frequent nuc creation/requeening		No		Yes, selection (breeding only from the best queens) should be performed to have productive and healthy colonies	3	5	4	5	5	4	5
12042419290	392208789	43	10	national	yes	yes	4	4	4		Queens mated in own apiary						Varroa is not a problem for me (about 5% of colony losses/year due to Varroa)	Several times a year	No			Varroa on bees	Varroa in the drone brood				Hygienic behaviour (pin-test method)		No, I treat colonies depending on their individual infestation levels							Removing drone brood			use chopped spinach/parsley .	Yes (please specify which method and how often)	generally rob frames to develop nucs.	Yes, selection (breeding only from the best queens) should be performed to have productive and healthy colonies	4	5	3	5	2	2	3
12042028700	392208789	4	4	national	no	yes	5	3	5		Queens mated in own apiary	Queens mated in own area					Varroa is a serious problem for me every year (frequent losses)	Several times a year	Yes	Varroa mortality, before treatment	Varroa mortality, after treatment	Varroa on bees	Varroa in the drone brood						Yes			Approved chemical treatments in Spring/Autumn	Oxalic acid in winter							Yes (please specify which method and how often)	splits if and when q/c are formed	Yes, selection (breeding only from the best queens) should be performed to have productive and healthy colonies	4	5	4	4	5	3	4
12041519928	392208789	10	4	national and 1 topbar	yes	yes	5	2	5		Queens mated in own apiary						Varroa is not a problem for me (about 5% of colony losses/year due to Varroa)	Several times a year	Yes			Varroa on bees				varroa on omf insert in winter and when in situ on small colonies/bad weather			I never treat for Varroa. (please specify why)	haven't treated last two years, prior 2 yrs treated only those with high infestation. no difference in mortality seen.	I don't treat									Yes (please specify which method and how often)	artificial swarm. only when bees rear queen larvae.	Partially, breeding from the best queens should be carried out, but the other less productive colonies should not be systematically requeened	3	5	3	5	4	4	5
12040803774	392208789	15	145	maisemore polys	no	yes	4	5	5	queen rearing	Queens mated in own apiary						Varroa is not a problem for me (about 5% of colony losses/year due to Varroa)	All year long	Yes	Varroa mortality, before treatment	Varroa mortality, after treatment		Varroa in the drone brood	Varroa in the worker brood		dwv			Yes				Oxalic acid in winter		Oxalic acid combined with brood interruption (nuc creation)			Frequent nuc creation/requeening	two splits on every colony each year. rarely see varroa infestation in autumn	Yes (please specify which method and how often)	splits.	Yes, selection (breeding only from the best queens) should be performed to have productive and healthy colonies	3	5	3	5	5	3	5
12040763700	392208789	8	42	commercial	yes	yes	3	4	5		Queens mated in own apiary	Queens mated in own area					Varroa is not a problem for me (about 5% of colony losses/year due to Varroa)	Several times a year	No				Varroa in the drone brood			mite drop on floor insert			I never treat for Varroa. (please specify why)	policy of fingal n . dublin assoc						Removing drone brood			brood break while doing swarm control	Yes (please specify which method and how often)	remove queen to nuc and allow colony to re queenn	Yes, selection (breeding only from the best queens) should be performed to have productive and healthy colonies	4	4	4	5	5	3	4
12040707046	392208789	18	20	national	yes	yes	5	4	5			Queens mated in own area		Queens bought from a pure race breeder (from Ireland)			There are occasional losses due to Varroa or viruses (10-20%/year)	All year long	No			Varroa on bees	Varroa in the drone brood						Yes		I don't treat									Yes (please specify which method and how often)	remove existing queen and some bees to a nuc and leave one queen cell.	Partially, breeding from the best queens should be carried out, but the other less productive colonies should not be systematically requeened	4	3	4	5	5	4	5
12040637240	392208789	6	7	national	no	yes	4	5	5		Queens mated in own apiary			Queens bought from a pure race breeder (from Ireland)			Varroa is not a problem for me (about 5% of colony losses/year due to Varroa)	All year long	Yes	Varroa mortality, before treatment	Varroa mortality, after treatment	Varroa on bees	Varroa in the drone brood				Hygienic behaviour (pin-test method)		No, I treat colonies depending on their individual infestation levels			Approved chemical treatments in Spring/Autumn				Removing drone brood	Total brood removal if necessary			Yes (please specify which method and how often)	artificial swarm if the need arises	Yes, selection (breeding only from the best queens) should be performed to have productive and healthy colonies	4	5	5	5	5	5	5
12040516247	392208789	8	20	british national	no	i don't know		3				Queens mated in own area		Queens bought from a pure race breeder (from Ireland)			Varroa is not a problem for me (about 5% of colony losses/year due to Varroa)	Once a year (spring or before treatment)	No			Varroa on bees							No, I treat colonies depending on their individual infestation levels			Approved chemical treatments in Spring/Autumn	Oxalic acid in winter							Yes (please specify which method and how often)	nucleus method	Yes, selection (breeding only from the best queens) should be performed to have productive and healthy colonies	3	3	3	3	3	3	2
12040473154	392208789	30	80		no	no	1	1	1		Queens mated in own apiary		Own queens mated at a particular mating station			inseminated	Varroa is not a problem for me (about 5% of colony losses/year due to Varroa)	Never	Yes				Varroa in the drone brood						Yes							Removing drone brood				Yes (please specify which method and how often)	inspections	Yes, selection (breeding only from the best queens) should be performed to have productive and healthy colonies	5	5	5	5	4	5	1
12040428714	392208789	10	2	commercial	yes	yes			5		Queens mated in own apiary						Varroa is not a problem for me (about 5% of colony losses/year due to Varroa)	Once a year (spring or before treatment)	No						Reproduction of Varroa				I never treat for Varroa. (please specify why)	fingal encourages the breeding of hygienic bees. 70-80 % don't treat for about 5 years +	I don't treat									Yes (please specify which method and how often)	pagden	Yes, selection (breeding only from the best queens) should be performed to have productive and healthy colonies	3	5	3	5	4	5	5
12040311096	392208789	4	6	4 national and 2 commercial	yes	yes	5	5	5			Queens mated in own area					Varroa is a problem for me every year, but I have things under control through treatments)	All year long	Yes	Varroa mortality, before treatment	Varroa mortality, after treatment	Varroa on bees	Varroa in the drone brood						Yes			Approved chemical treatments in Spring/Autumn	Oxalic acid in winter			Removing drone brood				Yes (please specify which method and how often)	artifucial swarm	Yes, selection (breeding only from the best queens) should be performed to have productive and healthy colonies	4	5	5	5	4	5	5
12040256795	392208789	1	2	national	no	yes	3	5	3	i got 2 swarms that happened to be dark bees		Queens mated in own area						Several times a year	Yes							varoa on a bottom board			Yes			Approved chemical treatments in Spring/Autumn								No		Partially, breeding from the best queens should be carried out, but the other less productive colonies should not be systematically requeened	1	4	3	5	5	5	4
12040234881	392208789	4	4	national	yes	yes	5	5	5		Queens mated in own apiary			Queens bought from a pure race breeder (from Ireland)			Varroa is not a problem for me (about 5% of colony losses/year due to Varroa)	Never	No							check for deformed wing disease	Hygienic behaviour (pin-test method)		I never treat for Varroa. (please specify why)	no morality from varroa.	I don't treat									Yes (please specify which method and how often)	artificial swarming	Partially, breeding from the best queens should be carried out, but the other less productive colonies should not be systematically requeened	5	1	1	5	5	3	4
12040166171	392208789	2	3	national	no	yes	5	3	5		Queens mated in own apiary						Varroa is a problem for me every year, but I have things under control through treatments)	Several times a year	Yes			Varroa on bees							No, I treat colonies depending on their individual infestation levels					Oxalic acid combined with brood interruption (queen cages in summer)						No		No, selection should not be performed (every colony is allowed to requeen freely).	4	5	4	5	3	5	3
12040157744	392208789	13	225	national cedar	yes	yes	5	5	5		Queens mated in own apiary	Queens mated in own area					There are occasional losses due to Varroa or viruses (10-20%/year)	All year long	Yes				Varroa in the drone brood		Reproduction of Varroa	dwv			I never treat for Varroa. (please specify why)	natural selection. i requeen colonies that have visible mite loads from colonies without						Removing drone brood	Total brood removal if necessary	Frequent nuc creation/requeening	break brood cycle	Yes (please specify which method and how often)	remove q to nuc in spring. then moniter build up of both colonies . keep them busy drawing wax with plenty of new foundation and rom	Yes, selection (breeding only from the best queens) should be performed to have productive and healthy colonies	4	3	3	5	5	3	4
12039462585	392208789	4	5	national timber	no	yes	4	4	5		Queens mated in own apiary						There are occasional losses due to Varroa or viruses (10-20%/year)	Several times a year	Yes	Varroa mortality, before treatment	Varroa mortality, after treatment								Yes				Oxalic acid in winter							Yes (please specify which method and how often)	split when risk of swarming	Partially, breeding from the best queens should be carried out, but the other less productive colonies should not be systematically requeened	2	4	4	5	5	4	3
12039437761	392208789	8	7	national	yes	yes	4	5	5			Queens mated in own area					Varroa is not a problem for me (about 5% of colony losses/year due to Varroa)	Several times a year	Yes		Varroa mortality, after treatment	Varroa on bees					Hygienic behaviour (pin-test method)		No, I treat colonies depending on their individual infestation levels			Approved chemical treatments in Spring/Autumn			Oxalic acid combined with brood interruption (nuc creation)					Yes (please specify which method and how often)	artificial swarm in response to queen cells	Yes, selection (breeding only from the best queens) should be performed to have productive and healthy colonies	4	5	4	5	5	4	2
12039380788	392208789	2	8	national and poly nucs	no	yes	5	3	4			Queens mated in own area	Own queens mated at a particular mating station				There are occasional losses due to Varroa or viruses (10-20%/year)	Only after treatment	Yes		Varroa mortality, after treatment							Hygienic behaviour, other methods (freeze brood etc.)	Yes			Approved chemical treatments in Spring/Autumn								Yes (please specify which method and how often)	nuc method
12039314498	392208789	6	2	national polystyrene	no	no									Queens bought from a pure race breeder (from other countries)	swarm	Varroa is not a problem for me (about 5% of colony losses/year due to Varroa)	Several times a year	Yes							varroa board under hive			No, I treat colonies depending on their individual infestation levels										icing sugar on brood box and bees	No		Partially, breeding from the best queens should be carried out, but the other less productive colonies should not be systematically requeened	5	4	4	5	3	3	3
12039241087	392208789	15	50	commercial	yes	yes	3	4	5		Queens mated in own apiary	Queens mated in own area	Own queens mated at a particular mating station	Queens bought from a pure race breeder (from Ireland)		galtee queens and colmore native amm queens	Varroa is not a problem for me (about 5% of colony losses/year due to Varroa)	Several times a year	Yes	Varroa mortality, before treatment	Varroa mortality, after treatment	Varroa on bees	Varroa in the drone brood	Varroa in the worker brood			Hygienic behaviour (pin-test method)		No, I treat colonies depending on their individual infestation levels							Removing drone brood		Frequent nuc creation/requeening	apigaurd	Yes (please specify which method and how often)	artificial splits, grafting queens & apidea r	Yes, selection (breeding only from the best queens) should be performed to have productive and healthy colonies	5	5	5	5	5	5	5
12039207411	392208789	5	3	national	no	yes	5	5	5		Queens mated in own apiary						Varroa is not a problem for me (about 5% of colony losses/year due to Varroa)	Several times a year	Yes		Varroa mortality, after treatment		Varroa in the drone brood		Reproduction of Varroa		Hygienic behaviour (pin-test method)		Yes			Approved chemical treatments in Spring/Autumn								No		Partially, breeding from the best queens should be carried out, but the other less productive colonies should not be systematically requeened	3	5	4	5	4	4	5
12039176771	392208789	5	4		yes	yes	3	5	5		Queens mated in own apiary
12039124370	392208789	5	3	national	yes	yes	5	4	5		Queens mated in own apiary						Varroa is not a problem for me (about 5% of colony losses/year due to Varroa)	Never	No							signs of varroa ie deformed wings etc, varroa in the hive			No, I treat colonies depending on their individual infestation levels			Approved chemical treatments in Spring/Autumn								Yes (please specify which method and how often)	artificial swarm	Yes, selection (breeding only from the best queens) should be performed to have productive and healthy colonies	4	3	3	5	5	1	4
12039110134	392208789	5	2	poly	yes	yes	3	3	3			Queens mated in own area					Varroa is not a problem for me (about 5% of colony losses/year due to Varroa)	Once a year (spring or before treatment)	Yes			Varroa on bees							Yes										apivar .amitraz	Yes (please specify which method and how often)	hive split	Yes, selection (breeding only from the best queens) should be performed to have productive and healthy colonies	3	5	5	5	5	5	3
12039102118	392208789	1	1	national	no	yes	5	5	5		Queens mated in own apiary	Queens mated in own area					Varroa is not a problem for me (about 5% of colony losses/year due to Varroa)	Never	No										I never treat for Varroa. (please specify why)	member of oofga	I don't treat									No		Partially, breeding from the best queens should be carried out, but the other less productive colonies should not be systematically requeened	4	3	2	5	4	3	5
12039064592	392208789	1	2	national	no	yes	4	4	5			Queens mated in own area					Varroa is a problem for me every year, but I have things under control through treatments)	Only after treatment	No		Varroa mortality, after treatment								No, I treat colonies depending on their individual infestation levels			Approved chemical treatments in Spring/Autumn								No		Yes, selection (breeding only from the best queens) should be performed to have productive and healthy colonies	4	4	4	4	3	3	3
12039059519	392208789	9	50	rose	yes	yes	5	4	5			Queens mated in own area					Varroa is not a problem for me (about 5% of colony losses/year due to Varroa)	Several times a year	No				Varroa in the drone brood						Yes			Approved chemical treatments in Spring/Autumn	Oxalic acid in winter			Removing drone brood				Yes (please specify which method and how often)	depending on the time of year i'll either do a shook swarm or remove the queen	Partially, breeding from the best queens should be carried out, but the other less productive colonies should not be systematically requeened	4	4	3	4	3	3	5
12039045869	392208789	3	4	national	yes	no	5	5	5		Queens mated in own apiary	Queens mated in own area					Varroa is not a problem for me (about 5% of colony losses/year due to Varroa)	Several times a year	No			Varroa on bees							I never treat for Varroa. (please specify why)	i sugar treat and haven't had high infestations						Removing drone brood			sugar treat	Yes (please specify which method and how often)	splits and queen removal	Partially, breeding from the best queens should be carried out, but the other less productive colonies should not be systematically requeened	3	5	5	5	5	5	3
12039027442	392208789	4	5	national	no	yes	5	5	5		Queens mated in own apiary			Queens bought from a pure race breeder (from Ireland)			Varroa is a problem for me every year, but I have things under control through treatments)	Several times a year	Yes		Varroa mortality, after treatment								Yes			Approved chemical treatments in Spring/Autumn								Yes (please specify which method and how often)	apiguard twice per yr	Partially, breeding from the best queens should be carried out, but the other less productive colonies should not be systematically requeened	3	5	3	5	5	5	5
12039023637	392208789	3	4	national	no	yes	4	4	5			Queens mated in own area		Queens bought from a pure race breeder (from Ireland)			There are occasional losses due to Varroa or viruses (10-20%/year)	Several times a year	Yes			Varroa on bees	Varroa in the drone brood	Varroa in the worker brood			Hygienic behaviour (pin-test method)		No, I treat colonies depending on their individual infestation levels			Approved chemical treatments in Spring/Autumn								Yes (please specify which method and how often)	split hive	Partially, breeding from the best queens should be carried out, but the other less productive colonies should not be systematically requeened	3	4	4	4	4	4	3
12038964503	392208789	15	4	national	no	yes	5	5	5			Queens mated in own area					There are occasional losses due to Varroa or viruses (10-20%/year)	Once a year (spring or before treatment)	Yes	Varroa mortality, before treatment			Varroa in the drone brood						Yes			Approved chemical treatments in Spring/Autumn				Removing drone brood		Frequent nuc creation/requeening		Yes (please specify which method and how often)	queen clipping; artificial swarm method (sometimes).	No, selection should not be performed (every colony is allowed to requeen freely).	5	3	5	5	5	3	5
12038826725	392208789	3	12	national	no	yes	4	4	4		Queens mated in own apiary			Queens bought from a pure race breeder (from Ireland)			Varroa is not a problem for me (about 5% of colony losses/year due to Varroa)	Once a year (spring or before treatment)	Yes				Varroa in the drone brood	Varroa in the worker brood					I never treat for Varroa. (please specify why)	i wish to let nature do its thing.. i feed my bees with hive alive and do splits twice yearly so to upset any varroa cycle present. i wish to keep my beds chemical free as possible	I don't treat					Removing drone brood		Frequent nuc creation/requeening		Yes (please specify which method and how often)	i do splits twice a season when i see queen cells..	Yes, selection (breeding only from the best queens) should be performed to have productive and healthy colonies	4	4	2	5	4	4	3
12038762284	392208789	8	30	national	no	yes	5	5	5		Queens mated in own apiary						Varroa is a problem for me every year, but I have things under control through treatments)	Several times a year	Yes	Varroa mortality, before treatment	Varroa mortality, after treatment	Varroa on bees	Varroa in the drone brood	Varroa in the worker brood					Yes			Approved chemical treatments in Spring/Autumn								Yes (please specify which method and how often)	split/ divide the queen with the brood	Yes, selection (breeding only from the best queens) should be performed to have productive and healthy colonies	4	5	5	4	5	4	4
12038658223	392208789	1	2	poly	no	yes	5	5	5		Queens mated in own apiary	Queens mated in own area					Varroa is not a problem for me (about 5% of colony losses/year due to Varroa)	Never	No							don’t know. beginner			Yes		I don't treat									No
12038527216	392208789	3	1	national	no	yes	4	4	5			Queens mated in own area					Varroa is not a problem for me (about 5% of colony losses/year due to Varroa)	Once a year (spring or before treatment)	No			Varroa on bees							Yes			Approved chemical treatments in Spring/Autumn								Yes (please specify which method and how often)	artificial swarm
12038522584	392208789	5	5	national poly	yes	yes	4	4	5	imported bees may bring in new pests/diseases as happened with varroa		Queens mated in own area					Varroa is a problem for me every year, but I have things under control through treatments)	Several times a year	Yes	Varroa mortality, before treatment	Varroa mortality, after treatment	Varroa on bees	Varroa in the drone brood						Yes			Approved chemical treatments in Spring/Autumn	Oxalic acid in winter							Yes (please specify which method and how often)	splitting in may	Yes, selection (breeding only from the best queens) should be performed to have productive and healthy colonies	4	3	4	3	4	3	5
12038435814	392208789	35		national	yes	yes	5	5	5		Queens mated in own apiary			Queens bought from a pure race breeder (from Ireland)			Varroa is not a problem for me (about 5% of colony losses/year due to Varroa)	Never	No		Varroa mortality, after treatment						Hygienic behaviour (pin-test method)		Yes				Oxalic acid in winter							Yes (please specify which method and how often)	removed the queen	Yes, selection (breeding only from the best queens) should be performed to have productive and healthy colonies	5	5	4	5	3	5	5
12038131455	392208789	30	18	langstroth poly hives	no	yes		1			Queens mated in own apiary						Varroa is not a problem for me (about 5% of colony losses/year due to Varroa)	Several times a year	No	Varroa mortality, before treatment	Varroa mortality, after treatment								No, I treat colonies depending on their individual infestation levels										formic acid (maqs)			No, selection should not be performed (every colony is allowed to requeen freely).	5	5	5	5	5	5	1
12038041921	392208789	2	1	irish black	no	yes	5	5	5			Queens mated in own area					Varroa is a problem for me every year, but I have things under control through treatments)	Only after treatment	Yes		Varroa mortality, after treatment								Yes				Oxalic acid in winter							Yes (please specify which method and how often)	artifidial	Yes, selection (breeding only from the best queens) should be performed to have productive and healthy colonies	3	3	4	5	5	3	4
12037819009	392208789	1	9	national wood and national poly hives	yes	yes	5	5	5			Queens mated in own area		Queens bought from a pure race breeder (from Ireland)			Varroa is a problem for me every year, but I have things under control through treatments)	Once a year (spring or before treatment)	Yes		Varroa mortality, after treatment	Varroa on bees	Varroa in the drone brood	Varroa in the worker brood			Hygienic behaviour (pin-test method)		Yes			Approved chemical treatments in Spring/Autumn	Oxalic acid in winter				Total brood removal if necessary			Yes (please specify which method and how often)	artificially split hives in spring	Yes, selection (breeding only from the best queens) should be performed to have productive and healthy colonies	5	5	3	5	5	5	5
12037790117	392208789	1	2	national	no	yes	5	5	5		Queens mated in own apiary
12037765390	392208789	35	43	commercial	no	yes	5	4	5					Queens bought from a pure race breeder (from Ireland)			Varroa is not a problem for me (about 5% of colony losses/year due to Varroa)	Several times a year	Yes	Varroa mortality, before treatment	Varroa mortality, after treatment		Varroa in the drone brood						Yes				Oxalic acid in winter							Yes (please specify which method and how often)	double blood, split end of may	Yes, selection (breeding only from the best queens) should be performed to have productive and healthy colonies	5	4	4	5	4	4	5
12037680767	392208789	3	4	wooden nationals and poly nucs	yes	yes	5	3	5			Queens mated in own area						Several times a year	No	Varroa mortality, before treatment	Varroa mortality, after treatment								Yes			Approved chemical treatments in Spring/Autumn	Oxalic acid in winter							Yes (please specify which method and how often)	artificial swarm	Yes, selection (breeding only from the best queens) should be performed to have productive and healthy colonies	3	4	4	5	5	4	5
12037670090	392208789	1	1	national	no	i don't know	4		5			Queens mated in own area					Varroa is not a problem for me (about 5% of colony losses/year due to Varroa)	Once a year (spring or before treatment)	Yes										No, I treat colonies depending on their individual infestation levels										sugar method	Yes (please specify which method and how often)	split but not successful as yet.	No, selection should not be performed (every colony is allowed to requeen freely).	4	4	3	5	5	4	4
12037552112	392208789	2	3	national	no	yes	5	5	5			Queens mated in own area					Varroa is not a problem for me (about 5% of colony losses/year due to Varroa)	Several times a year	Yes				Varroa in the drone brood			bottom board			I never treat for Varroa. (please specify why)	not yet	I don't treat									No		Partially, breeding from the best queens should be carried out, but the other less productive colonies should not be systematically requeened	3	4	4	5	5	5	4
12037451992	392208789	45	2	national	no	yes	5		5	suited to our specific climate and has survived it		Queens mated in own area					There are occasional losses due to Varroa or viruses (10-20%/year)	Once a year (spring or before treatment)	Yes	Varroa mortality, before treatment	Varroa mortality, after treatment								Yes			Approved chemical treatments in Spring/Autumn				Removing drone brood				Yes (please specify which method and how often)	allow plenty of space in the hive and keeping young egg laying queens where pissible	Yes, selection (breeding only from the best queens) should be performed to have productive and healthy colonies	3	4	4	5	5	4	5
12037350435	392208789	3	4	national	no	yes		4	5		Queens mated in own apiary			Queens bought from a pure race breeder (from Ireland)			Varroa is a problem for me every year, but I have things under control through treatments)	Several times a year	Yes		Varroa mortality, after treatment		Varroa in the drone brood	Varroa in the worker brood	Reproduction of Varroa			Hygienic behaviour, other methods (freeze brood etc.)	Yes			Approved chemical treatments in Spring/Autumn	Oxalic acid in winter			Removing drone brood				Yes (please specify which method and how often)	artificial swarm	Partially, breeding from the best queens should be carried out, but the other less productive colonies should not be systematically requeened	3	4	2	5	3	4	4
12037220729	392208789	3	5	commercial	no	no						Queens mated in own area					Varroa is not a problem for me (about 5% of colony losses/year due to Varroa)	Several times a year	Yes			Varroa on bees	Varroa in the drone brood						I never treat for Varroa. (please specify why)	bees don’t seem to have a varroa problem	I don't treat									No		No, selection should not be performed (every colony is allowed to requeen freely).	1	1	1	5	5	5	3
12037209679	392208789	6	20	commercial and national	no	yes	5	5	5			Queens mated in own area					Varroa is not a problem for me (about 5% of colony losses/year due to Varroa)	Once a year (spring or before treatment)	Yes	Varroa mortality, before treatment	Varroa mortality, after treatment							Hygienic behaviour, other methods (freeze brood etc.)	No, I treat colonies depending on their individual infestation levels			Approved chemical treatments in Spring/Autumn								Yes (please specify which method and how often)	artificial swarm in spring	No, selection should not be performed (every colony is allowed to requeen freely).	5	1	5	5	5	5	5
12037153586	392208789	5	2	national	yes	yes	5	5	5							1 queen given to me in the same county	There are occasional losses due to Varroa or viruses (10-20%/year)	Once a year (spring or before treatment)	No							the number of varroa on bottom board when cleaned and left for 24hours			Yes			Approved chemical treatments in Spring/Autumn								No
12037135964	392208789	1	4	national	no	yes	5	5	5		Queens mated in own apiary	Queens mated in own area					Varroa is not a problem for me (about 5% of colony losses/year due to Varroa)	Several times a year	No			Varroa on bees	Varroa in the drone brood			varroa on the mesh floor			No, I treat colonies depending on their individual infestation levels			Approved chemical treatments in Spring/Autumn								Yes (please specify which method and how often)	splits	Yes, selection (breeding only from the best queens) should be performed to have productive and healthy colonies	3	5	4	5	5	5	5
12036965474	392208789	6	6	national	no	yes	5	5	5			Queens mated in own area					Varroa is not a problem for me (about 5% of colony losses/year due to Varroa)	Several times a year	Yes	Varroa mortality, before treatment	Varroa mortality, after treatment	Varroa on bees						Hygienic behaviour, other methods (freeze brood etc.)	Yes			Approved chemical treatments in Spring/Autumn	Oxalic acid in winter							Yes (please specify which method and how often)	pandemic artificial swarm control	Yes, selection (breeding only from the best queens) should be performed to have productive and healthy colonies	5	4	3	5	5	4	5
12036900932	392208789	1	1	commercial	no	yes	5	5	5		Queens mated in own apiary	Queens mated in own area				brood frame of native black bee given by grace	There are occasional losses due to Varroa or viruses (10-20%/year)	Several times a year	Yes				Varroa in the drone brood			use open mesh flooring and every inspection screen board is checked		Hygienic behaviour, other methods (freeze brood etc.)	I never treat for Varroa. (please specify why)	i check for varroa at every inspection by checking the board it was my intention this year to do a test but a recent change of the queen late in the season prevented me as i didn’t want to affect her laying	I don't treat									Yes (please specify which method and how often)	not needed to yet	Partially, breeding from the best queens should be carried out, but the other less productive colonies should not be systematically requeened	4	4	5	5	5	4	5
12036809439	392208789	2	3	national	no	yes	5	5	5			Queens mated in own area					Varroa is not a problem for me (about 5% of colony losses/year due to Varroa)	All year long	Yes	Varroa mortality, before treatment	Varroa mortality, after treatment		Varroa in the drone brood						Yes			Approved chemical treatments in Spring/Autumn								Yes (please specify which method and how often)	pagden when required	Partially, breeding from the best queens should be carried out, but the other less productive colonies should not be systematically requeened	3	3	3	4	4	3	4
12036808638	392208789	2	4	national	no	yes	5	3	5		Queens mated in own apiary			Queens bought from a pure race breeder (from Ireland)			Varroa is not a problem for me (about 5% of colony losses/year due to Varroa)	Never	No										I never treat for Varroa. (please specify why)	i try to let the bees survive as naturally as possible	I don't treat									Yes (please specify which method and how often)	artificial swarm	Yes, selection (breeding only from the best queens) should be performed to have productive and healthy colonies	3	5	5	5	5	5	5
12036791305	392208789	13	35	national timber hive	no	yes	5	5	5		Queens mated in own apiary			Queens bought from a pure race breeder (from Ireland)			There are occasional losses due to Varroa or viruses (10-20%/year)	Several times a year	Yes				Varroa in the drone brood	Varroa in the worker brood					No, I treat colonies depending on their individual infestation levels				Oxalic acid in winter							Yes (please specify which method and how often)	pagden	Yes, selection (breeding only from the best queens) should be performed to have productive and healthy colonies	3	4	5	5	5	5	4
12036786989	392208789	4	5	poly nationals	no	yes	5	1	5			Queens mated in own area		Queens bought from a pure race breeder (from Ireland)			There are occasional losses due to Varroa or viruses (10-20%/year)	Once a year (spring or before treatment)	Yes		Varroa mortality, after treatment	Varroa on bees	Varroa in the drone brood			dwv			Yes				Oxalic acid in winter			Removing drone brood			varroamed	Yes (please specify which method and how often)	splitting, removal of qc, all summer	Partially, breeding from the best queens should be carried out, but the other less productive colonies should not be systematically requeened	4	4	3	4	4	3	2
12036688662	392208789	3	3	topbar	no	yes	5	5	5			Queens mated in own area					Varroa is not a problem for me (about 5% of colony losses/year due to Varroa)	Never	No							visual check on bee health			I never treat for Varroa. (please specify why)	because it hasn’t been a problem and they have to be able to overcome it naturally and can only do so if left untreated	I don't treat									Yes (please specify which method and how often)	inspect hives weekly during swarm season looking for queen cells	No, selection should not be performed (every colony is allowed to requeen freely).	3	3	3	4	4	3	4
12035500411	392208789	12	12	warre	yes	yes	5	5	5		Queens mated in own apiary						There are occasional losses due to Varroa or viruses (10-20%/year)	Never	No							no inspection			I never treat for Varroa. (please specify why)	darwinian selection	I don't treat									Yes (please specify which method and how often)	sometimes i drive the swarm in an empty box	No, selection should not be performed (every colony is allowed to requeen freely).	1	1	3			1	5
12035429698	392208789	15	12	commercial/national	no	yes	5	5	5			Queens mated in own area					Varroa is not a problem for me (about 5% of colony losses/year due to Varroa)	Never	Yes							omf bottom board			Yes		I don't treat									Yes (please specify which method and how often)	removing a nuc	No, selection should not be performed (every colony is allowed to requeen freely).	4	5	4	5	5	5	4
12035105928	392208789	2	3	1 wooden national and 2 poly national	no	yes	5		5			Queens mated in own area					Varroa is not a problem for me (about 5% of colony losses/year due to Varroa)	All year long	No							check bottom tray			I never treat for Varroa. (please specify why)	hoping to keep bees without treatment	I don't treat									No			2	2	3	5	5	5	3
12035064339	392208789	10	34	national	yes	yes	5	5	5			Queens mated in own area					Varroa is not a problem for me (about 5% of colony losses/year due to Varroa)	Several times a year	No							natural fall on the insert board, spring ,autumn,rough estimate			I never treat for Varroa. (please specify why)	not needed - usually very low varroa count	I don't treat									Yes (please specify which method and how often)	early and late splits, new frames in the brood nest to encourage growth in spring and disturb growth in summer - also move 1/2 brood up over the qe to give room in the brood area	Partially, breeding from the best queens should be carried out, but the other less productive colonies should not be systematically requeened	4	4	4	5	5	4	5
12033432288	392208789	4	13	national	yes	yes	2	4	4		Queens mated in own apiary	Queens mated in own area					Varroa is not a problem for me (about 5% of colony losses/year due to Varroa)	All year long	Yes	Varroa mortality, before treatment	Varroa mortality, after treatment		Varroa in the drone brood						Yes			Approved chemical treatments in Spring/Autumn	Oxalic acid in winter			Removing drone brood	Total brood removal if necessary			Yes (please specify which method and how often)	nuc method and vertical split	Yes, selection (breeding only from the best queens) should be performed to have productive and healthy colonies	4	5	2	5	4	3	5
12030490015	392208789	9	5	national, both cedar and polystyrene	no	yes	5	4	4		Queens mated in own apiary	Queens mated in own area					Varroa is not a problem for me (about 5% of colony losses/year due to Varroa)	Several times a year	Yes							varroa dead on the cleaning board		Hygienic behaviour, other methods (freeze brood etc.)	I never treat for Varroa. (please specify why)	i do not use chemicals									caster sugar dusting and agitation	Yes (please specify which method and how often)	i split healthy hives late april	No, selection should not be performed (every colony is allowed to requeen freely).	3	1	5	4	1	1	1
12030342442	392208789	1	2	national	no	yes	5	4	5		Queens mated in own apiary						Varroa is not a problem for me (about 5% of colony losses/year due to Varroa)	Several times a year	Yes	Varroa mortality, before treatment	Varroa mortality, after treatment								Yes			Approved chemical treatments in Spring/Autumn								No		No, selection should not be performed (every colony is allowed to requeen freely).	3	4	4	5	5	4	3
12029958584	392208789	15	7	7national	yes	yes	5	5	5			Queens mated in own area					Varroa is not a problem for me (about 5% of colony losses/year due to Varroa)	Several times a year	Yes	Varroa mortality, before treatment	Varroa mortality, after treatment								No, I treat colonies depending on their individual infestation levels			Approved chemical treatments in Spring/Autumn								Yes (please specify which method and how often)	split hive and catch them🤣	No, selection should not be performed (every colony is allowed to requeen freely).	4	5	4	5	4	5	3
12029743072	392208789	8	3	national	no	yes	3	4	5					Queens bought from a pure race breeder (from Ireland)			Varroa is not a problem for me (about 5% of colony losses/year due to Varroa)	Never	No										Yes				Oxalic acid in winter							No		Partially, breeding from the best queens should be carried out, but the other less productive colonies should not be systematically requeened	4	2	4	5	3	2	3
0		25	3	commercial	yes	yes	5		5			Queens mated in own area					Varroa is not a problem for me (about 5% of colony losses/year due to Varroa)	All year long	Yes							varroa on floor insert				tolerance will evolve	I don't treat										take out nuc when queen cells show	No, selection should not be performed (every colony is allowed to requeen freely).	2	4	3	4	4	4	4
1		41	15	national	yes		5	5	5			Queens mated in own area					Varroa is not a problem for me (about 5% of colony losses/year due to Varroa)	Once a year (spring or before treatment)	Yes							varroa on floor insert				tolerance will evolve	I don't treat										nuc creation	Partially, breeding from the best queens should be carried out, but the other less productive colonies should not be systematically requeened	5	5	5	5	5	5	5
2		3	7	national	yes	no	3	1	2			Queens mated in own area					Varroa is not a problem for me (about 5% of colony losses/year due to Varroa)	Several times a year	Yes										Yes										apiguard	Yes	clipping one wing of queen	No, selection should not be performed (every colony is allowed to requeen freely).	5	3	4	5	1	1	1
3		20	30	national	yes	yes	5	5	5		Queens mated in own apiary						Varroa is not a problem for me (about 5% of colony losses/year due to Varroa)	Several times a year					Varroa in the drone brood							no requirement	I don't treat												1	5	1	5	5	1	5
4		6	2	langstroth	no	i don't know				started with black bees now they have striped		Queens mated in own area					Varroa is not a problem for me (about 5% of colony losses/year due to Varroa)	All year long	No				Varroa in the drone brood		Reproduction of Varroa				No, I treat colonies depending on their individual infestation levels		I don't treat					Removing drone brood			feed with pollen	Yes	nuc creation when needed	No, selection should not be performed (every colony is allowed to requeen freely).	1	1	1	5	1	1	1
5		52	48	national	no	yes	5							Queens bought from a pure race breeder (from Ireland)			Varroa is not a problem for me (about 5% of colony losses/year due to Varroa)	Several times a year	no										Yes				Oxalic acid in winter							Yes	yes, nuc creation once a year	Partially, breeding from the best queens should be carried out, but the other less productive colonies should not be systematically requeened	5	1	1	5	1	5	1
6			15	variety		yes		5	4			Queens mated in own area					Varroa is not a problem for me (about 5% of colony losses/year due to Varroa)	Never	no												I don't treat									Yes	bait hives	No, selection should not be performed (every colony is allowed to requeen freely).	3	4	2	5	1	1	1
7		25	7	national	no	no		5				Queens mated in own area						Several times a year	no				Varroa in the drone brood	Varroa in the worker brood					I never treat for Varroa	stopped 5 or 6 years ago	I don't treat									Yes	yes, artifical swarm 1 per season	No, selection should not be performed (every colony is allowed to requeen freely).	1	4	3	5	5	3	1
8		40	6	rose	no	yes		5			Queens mated in own apiary	Queens mated in own area					Varroa is not a problem for me (about 5% of colony losses/year due to Varroa)	All year long	yes	Varroa mortality, before treatment	Varroa mortality, after treatment								Yes			Approved chemical treatments in Spring/Autumn								Yes	yes, break queen cells when they appear	No, selection should not be performed (every colony is allowed to requeen freely).				5
9		20	5	national	yes	yes	4	3	5			Queens mated in own area		Queens bought from a pure race breeder (from Ireland)			Varroa is not a problem for me (about 5% of colony losses/year due to Varroa)	Once a year (spring or before treatment)	yes							prescence of varroa	Hygienic behaviour (pin-test method)		I never treat for Varroa	we feel out bees have evolved to deal with it	I don't treat									Yes	yes	Partially, breeding from the best queens should be carried out, but the other less productive colonies should not be systematically requeened	2		1	5		4	3
10		3	2	national	yes	yes	3	2	1					Queens bought from a pure race breeder (from Ireland)			Varroa is not a problem for me (about 5% of colony losses/year due to Varroa)	Several times a year											I never treat for Varroa	john mc mullans research suggesting bees can handle it	I don't treat									No	no	Partially, breeding from the best queens should be carried out, but the other less productive colonies should not be systematically requeened		4		5	2	2	1
11		80	30	national	yes	yes			5		Queens mated in own apiary						Varroa is not a problem for me (about 5% of colony losses/year due to Varroa)	Several times a year	No		Varroa mortality, after treatment	Varroa on bees							No, I treat colonies depending on their individual infestation levels			Approved chemical treatments in Spring/Autumn								Yes				4				4	5
12		60	2	national	yes	yes	5	5	5			Queens mated in own area					Varroa is a problem for me every year, but I have things under control through treatments)	Several times a year	yes	Varroa mortality, before treatment	Varroa mortality, after treatment								Yes			Approved chemical treatments in Spring/Autumn								Yes	artifical swarm once per season	Yes, selection (breeding only from the best queens) should be performed to have productive and healthy colonies	4	2	3		5	1
13		10	20	national	yes	yes	5	5	5		Queens mated in own apiary						There are occasional losses due to Varroa or viruses (10-20%/year)	Several times a year	yes			Varroa on bees	Varroa in the drone brood	Varroa in the worker brood					No, I treat colonies depending on their individual infestation levels			Approved chemical treatments in Spring/Autumn						Frequent nuc creation/requeening		Yes	old queen in nuc once a year	Partially, breeding from the best queens should be carried out, but the other less productive colonies should not be systematically requeened	1	4		5	3	2
14		35	130	national	yes	yes	5		5		Queens mated in own apiary						Varroa is a problem for me every year, but I have things under control through treatments)	Only after treatment			Varroa mortality, after treatment						Hygienic behaviour (pin-test method)		Yes			Approved chemical treatments in Spring/Autumn	Oxalic acid in winter							Yes	break queen cells	Yes, selection (breeding only from the best queens) should be performed to have productive and healthy colonies	3						1
15		30	35	national commercial	yes	yes	2	1	3			Queens mated in own area		Queens bought from a pure race breeder (from Ireland)			Varroa is a problem for me every year, but I have things under control through treatments)	Once a year (spring or before treatment)	yes		Varroa mortality, after treatment		Varroa in the drone brood						No, I treat colonies depending on their individual infestation levels				Oxalic acid in winter		Oxalic acid combined with brood interruption (nuc creation)					Yes	queen removed to nuc	Partially, breeding from the best queens should be carried out, but the other less productive colonies should not be systematically requeened	5		1	2	3
16		5	20	national	yes	yes	4	4	5		Queens mated in own apiary	Queens mated in own area	Own queens mated at a particular mating station						No										Yes											Yes	artificial swarming, queen plus two frames of brood and two shakes of bees.	Partially, breeding from the best queens should be carried out, but the other less productive colonies should not be systematically requeened	2	4	3	5	5	3	5
																																															4
[truncated: 29 more columns]
